# Supplementary material for: Effects of an over-the-counter lactic-acid containing intra-vaginal douching product on the vaginal microbiota
Source: PubMed Central journal article supplement (PMC6659218; doi:10.1186/s12866-019-1545-0), 2019-07-25
Supplement: 12866_2019_1545_MOESM3_ESM.pdf [file 12866_2019_1545_MOESM3_ESM.pdf]

### Color Key

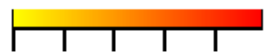

0 0.4 0.8

Relative abundance

VH01

Sex  
Menses  
Douching

- Douching yes
- Douching no
- Menses yes
- Menses no
- Sex yes
- Sex no

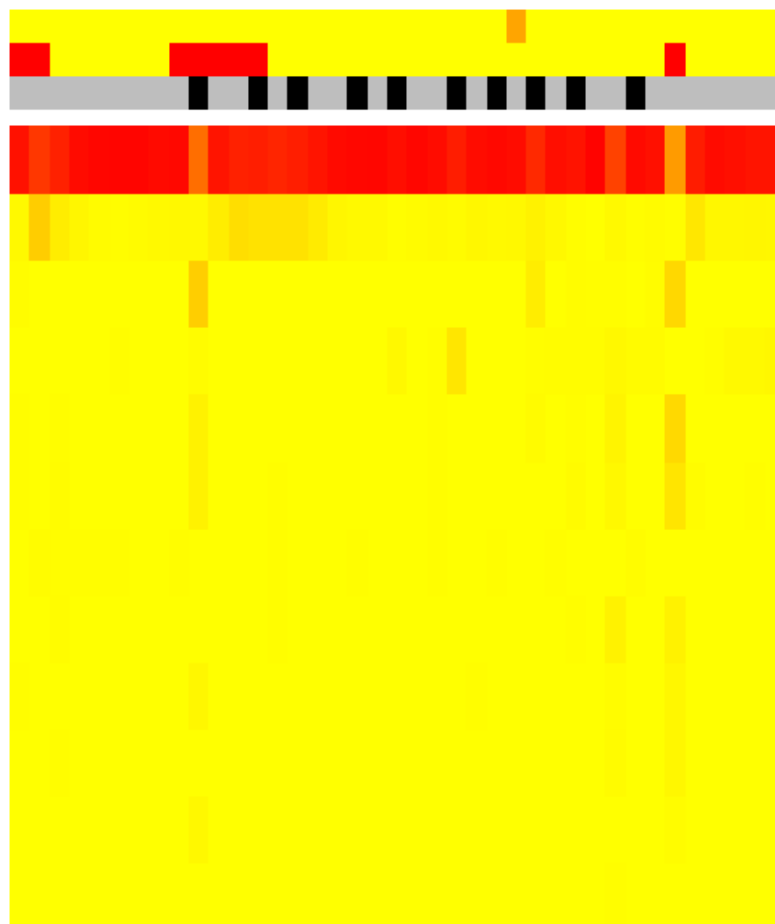

Lactobacillus crispatus

Lactobacillus jensenii

Lactobacillus iners

Pseudomonas

Megasphaera

Gardnerella vaginalis

Lactobacillus vaginalis

Prevotella genogroup 1

Leptotrichia amnionii

Atopobium vaginae

candidate division TM7

Proteobacteria

# Color Key

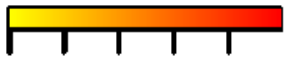

0 0.4 0.8

Relative abundance

VH02

Sex  
Menses  
Douching

- Douching yes
- Douching no
- Menses yes
- Menses no
- Sex yes
- Sex no

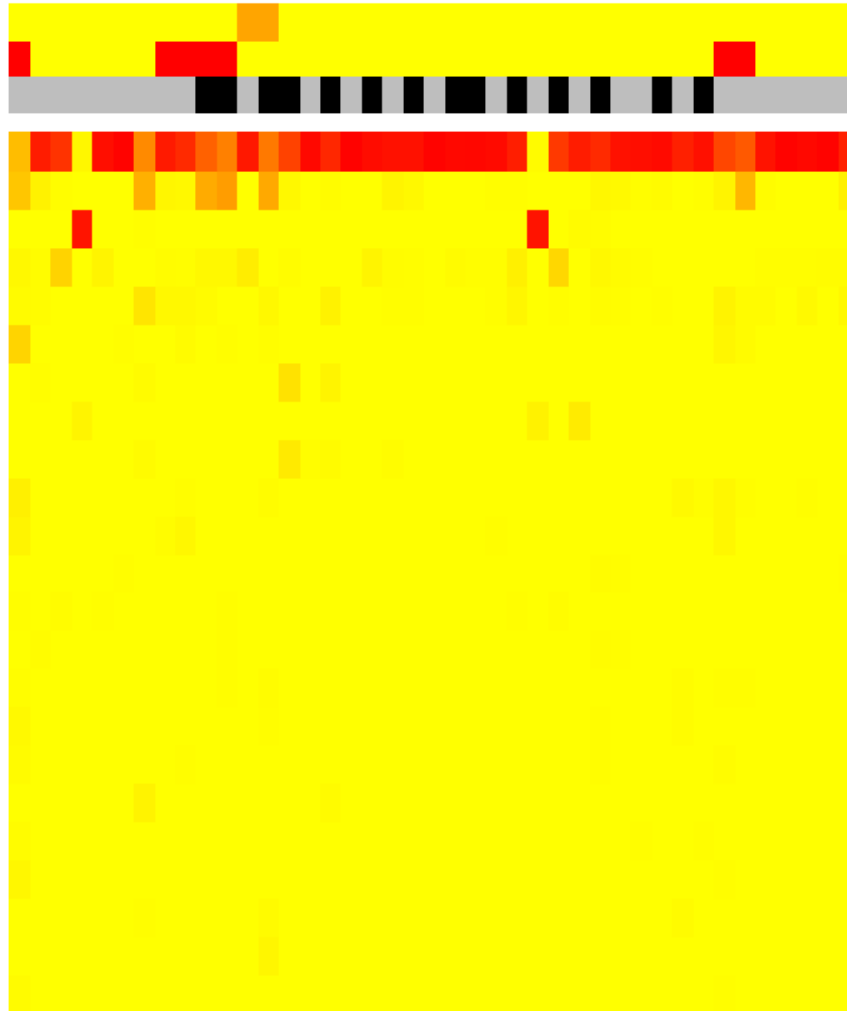

- Lactobacillus crispatus
- Lactobacillus iners
- Enterobacteriaceae
- Pseudomonas
- Lactobacillus jensenii
- Prevotella
- Megasphaera
- Staphylococcus
- Gardnerella vaginalis
- Prevotella genogroup 2
- Actinomycetales
- Clostridiales
- Proteobacteria
- Lactobacillus coleohominis
- Dialister
- Peptoniphilus harei
- Fingoldia magna
- Leptotrichia amnionii
- Anaerococcus
- Porphyromonas uenonis
- Prevotella disiens
- Lactobacillus vaginalis
- Prevotella genogroup 7

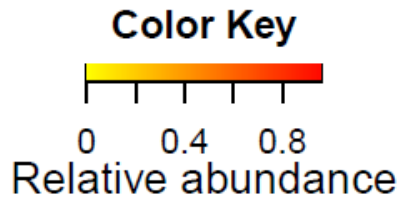

VH03

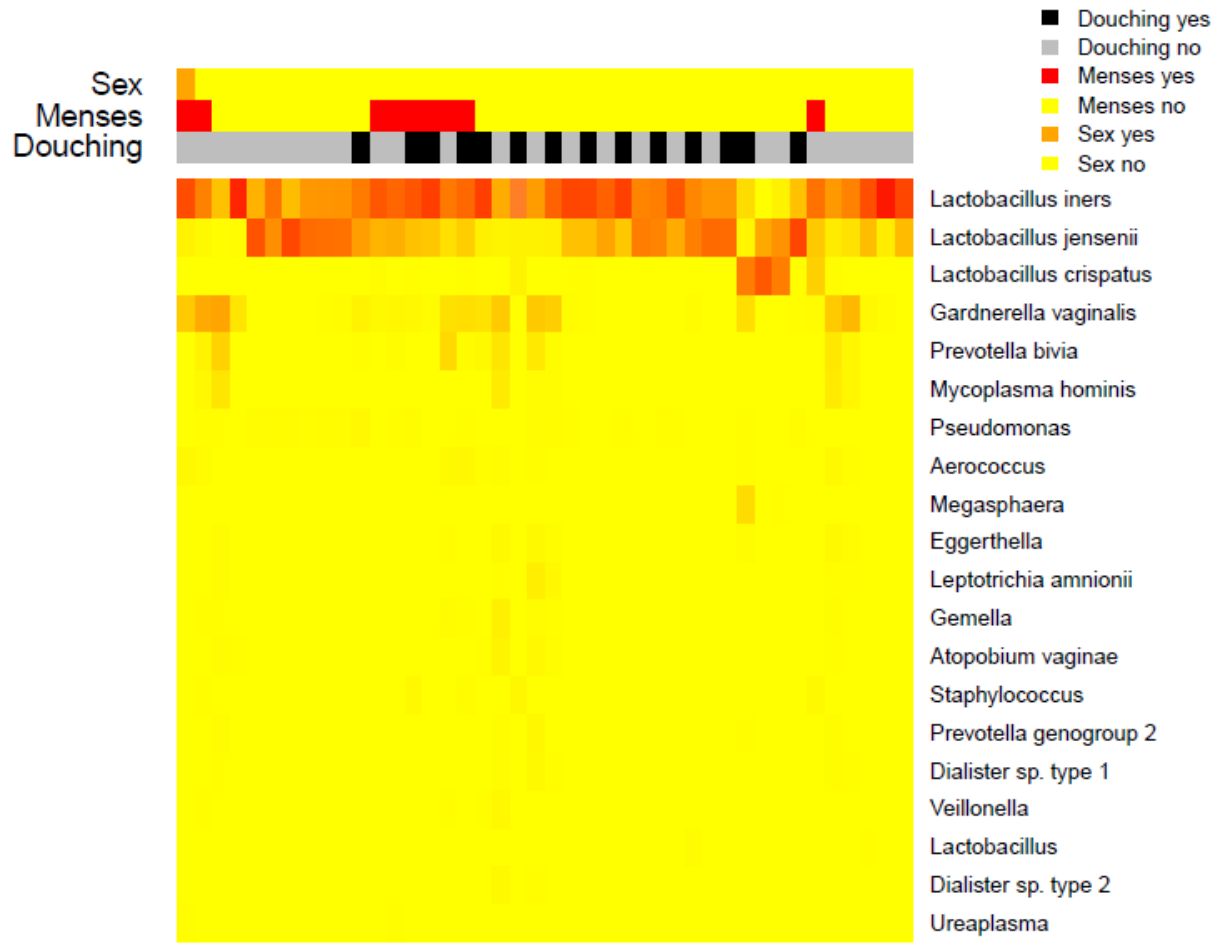

### Color Key

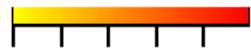

0 0.4 0.8

Relative abundance

VH04

Sex  
Menses  
Douching

- Douching yes
- Douching no
- Menses yes
- Menses no
- Sex yes
- Sex no

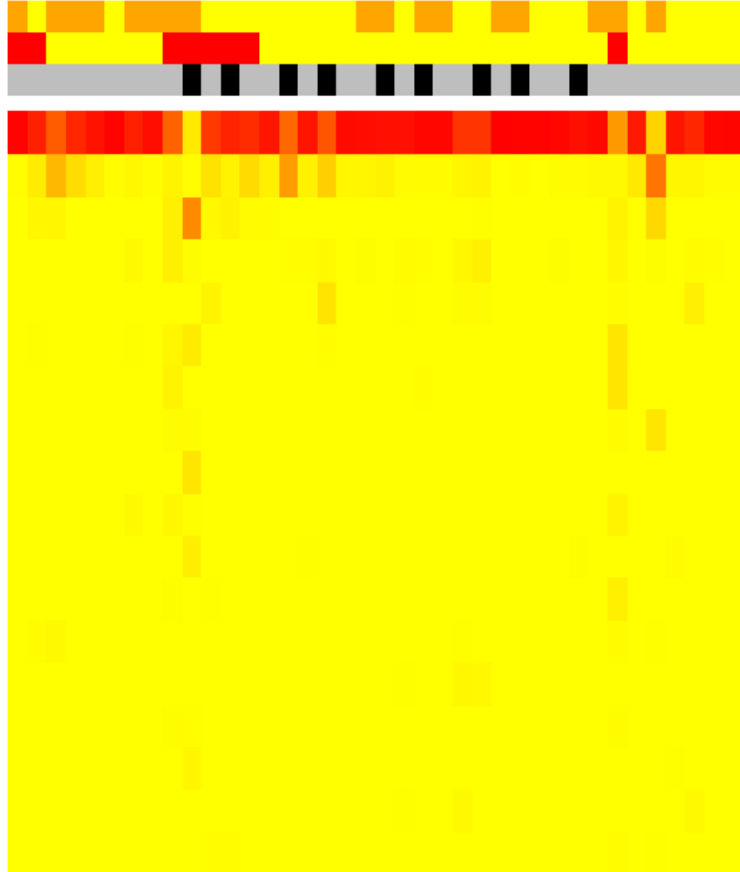

- Lactobacillus crispatus
- Lactobacillus jensenii
- Streptococcus agalactiae
- Pseudomonas
- Lactobacillus iners
- Staphylococcus
- Actinomycetales
- Streptococcus
- Bacteroides
- Veillonella
- Eubacterium
- Fingoldia magna
- Ureaplasma
- Gardnerella vaginalis
- Proteobacteria
- Clostridiales
- Megasphaera
- Streptococcus anginosus

### Color Key

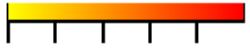

0 0.4 0.8

Relative abundance

VH05

Sex  
Menses  
Douching

- Douching yes
- Douching no
- Menses yes
- Menses no
- Sex yes
- Sex no

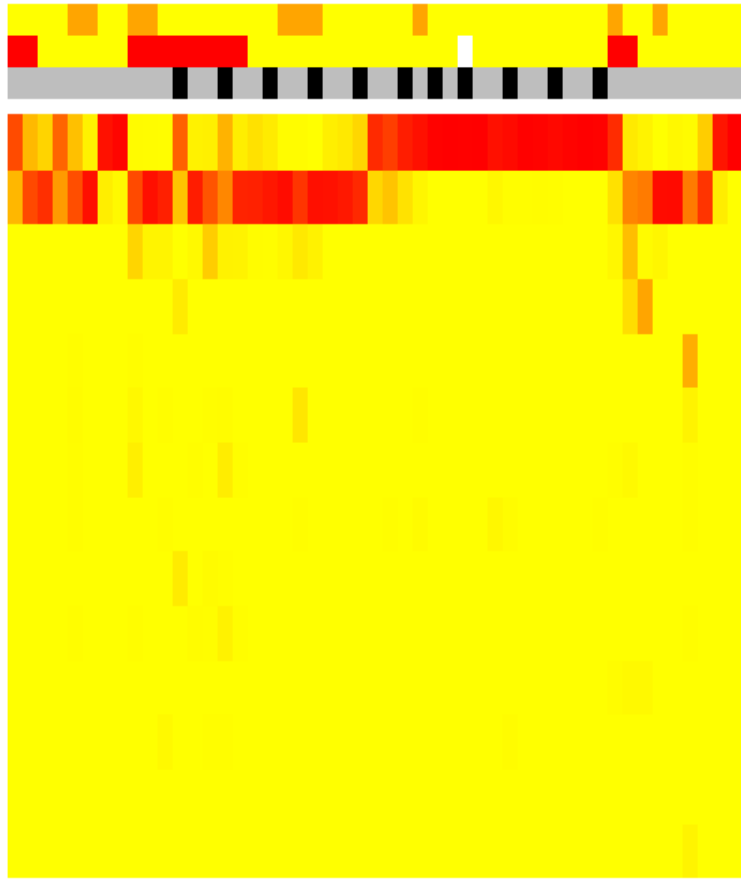

- Lactobacillus crispatus
- Lactobacillus iners
- Gardnerella vaginalis
- candidate division TM7
- Streptococcus
- Enterobacteriaceae
- Streptococcus agalactiae
- Ureaplasma
- Prevotella bivia
- Staphylococcus
- Aerococcus
- Fingoldia magna
- Lactobacillus jensenii
- Streptococcus salivarius

### Color Key

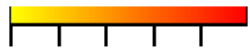

0 0.4 0.8

VH06

Relative abundance

Sex  
Menses  
Douching

- Douching yes
- Douching no
- Menses yes
- Menses no
- Sex yes
- Sex no

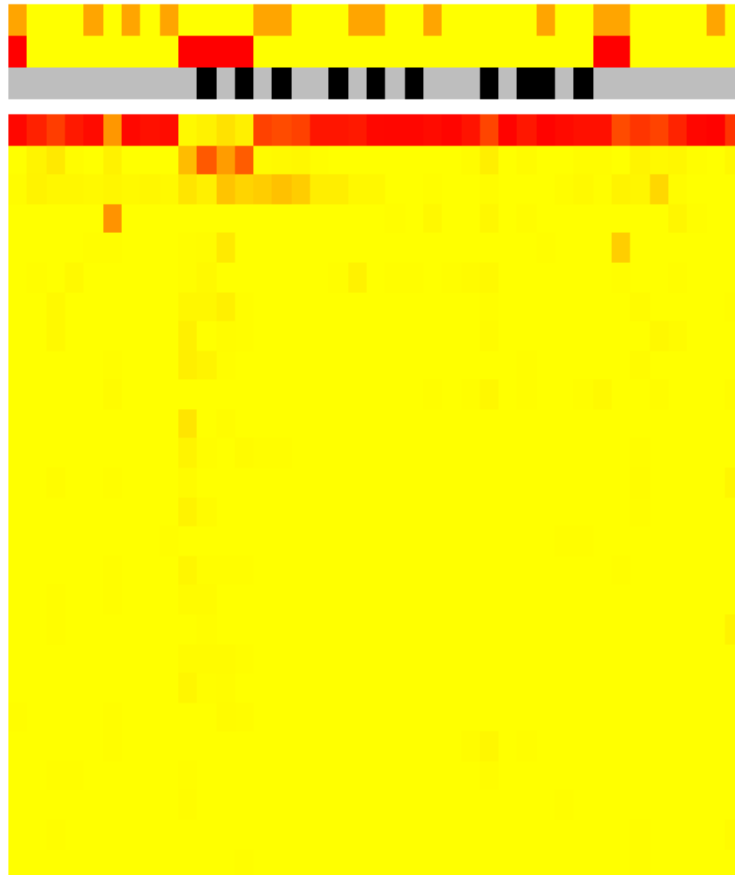

- Lactobacillus crispatus
- Gardnerella vaginalis
- Lactobacillus jensenii
- Lactobacillus iners
- Staphylococcus
- Pseudomonas
- Prevotella bivia
- Leptotrichia amnionii
- Fingoldia magna
- Megasphaera
- Enterobacteriaceae
- Bacteroides
- Prevotella genogroup 2
- Peptoniphilus harei
- Lactobacillus vaginalis
- Ureaplasma
- Anaerococcus
- Dialister sp. type 2
- Peptostreptococcus
- Streptococcus anginosus
- Aerococcus
- Prevotella genogroup 1
- Atopobium vaginae
- Actinomycetales
- Prevotella disiens
- Dialister

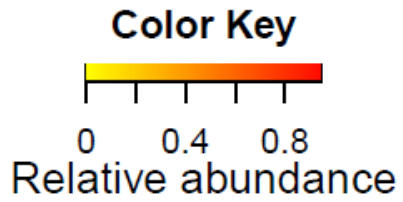

VH07

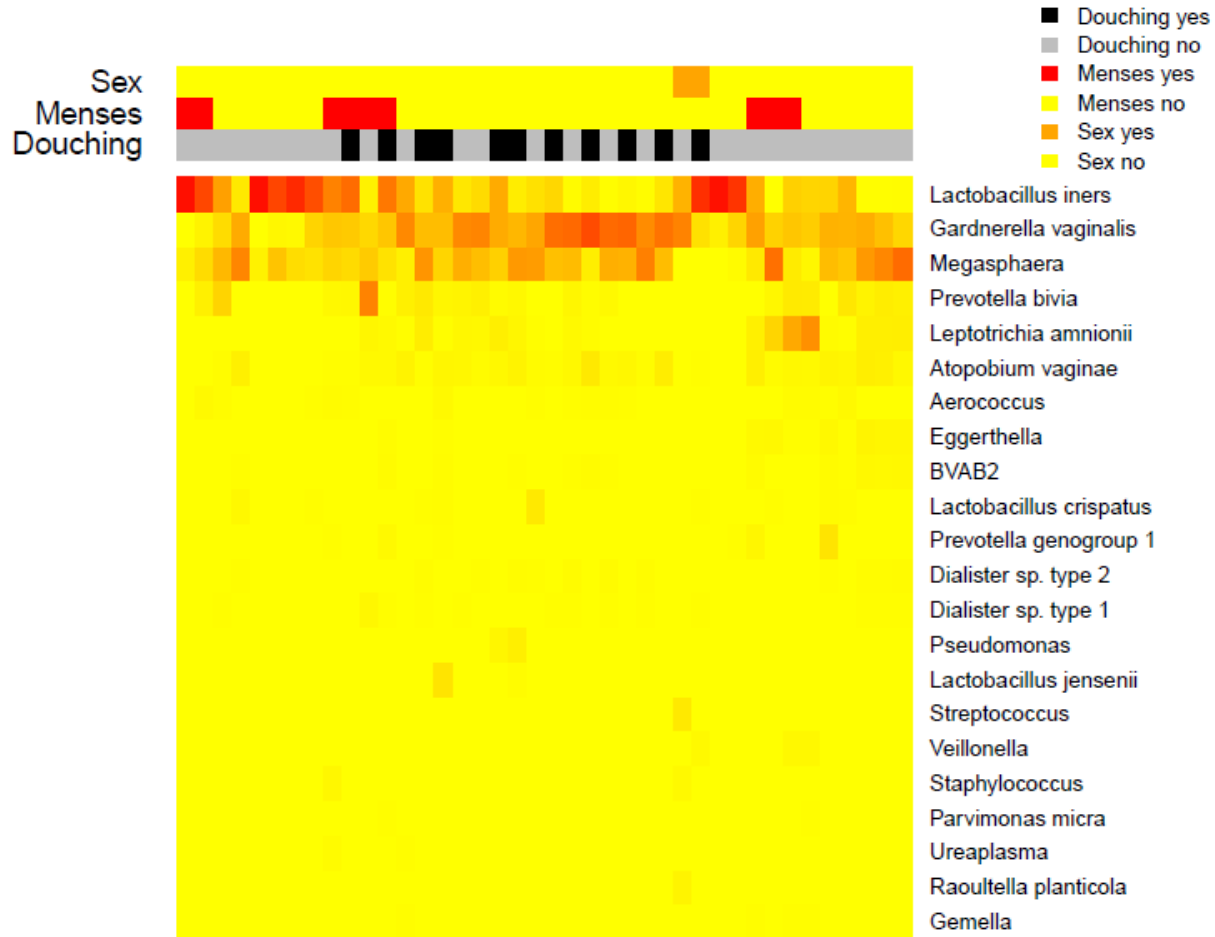

### Color Key

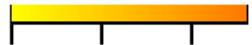

0 0.2 0.4

Relative abundance

VH08

Sex  
Menses  
Douching

- Douching yes
- Douching no
- Menses yes
- Menses no
- Sex yes
- Sex no

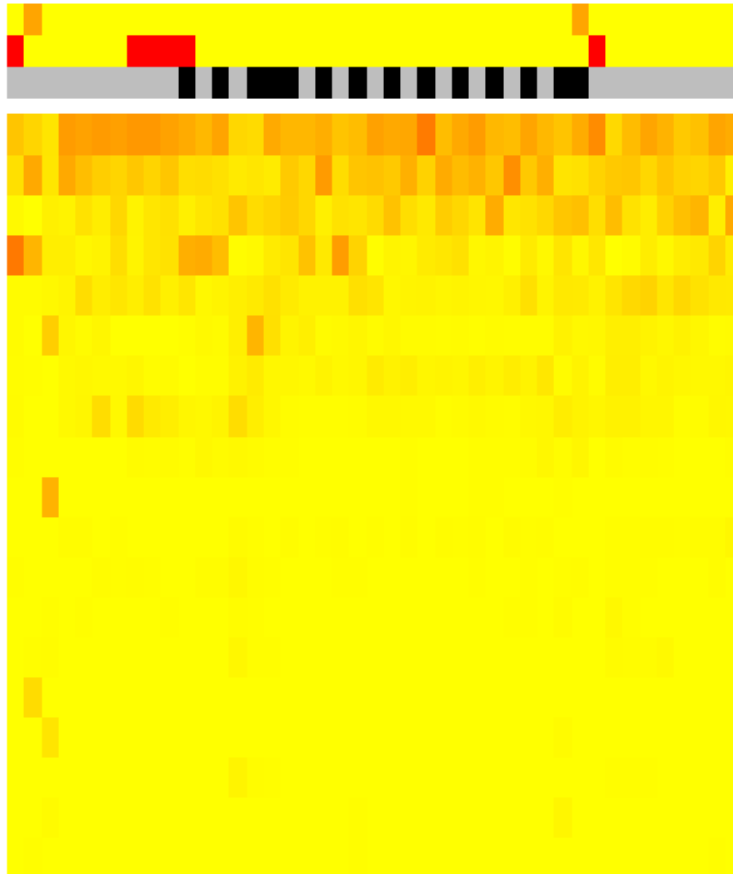

Gardnerella vaginalis  
Megasphaera  
Prevotella genogroup 1  
Lactobacillus iners  
Atopobium vaginae  
Leptotrichia amnionii  
Eggerthella  
BVAB2  
Prevotella buccalis  
Lactobacillus crispatus  
Dialister sp. type 2  
Parvimonas micra  
Dialister sp. type 1  
Prevotella genogroup 2  
Prevotella bivia  
Lactobacillus jensenii  
Porphyromonas uenonis  
Pseudomonas  
Aerococcus



### Color Key

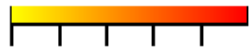

0 0.4 0.8

Relative abundance

VH09

Sex  
Menses  
Douching

- Douching yes
- Douching no
- Menses yes
- Menses no
- Sex yes
- Sex no

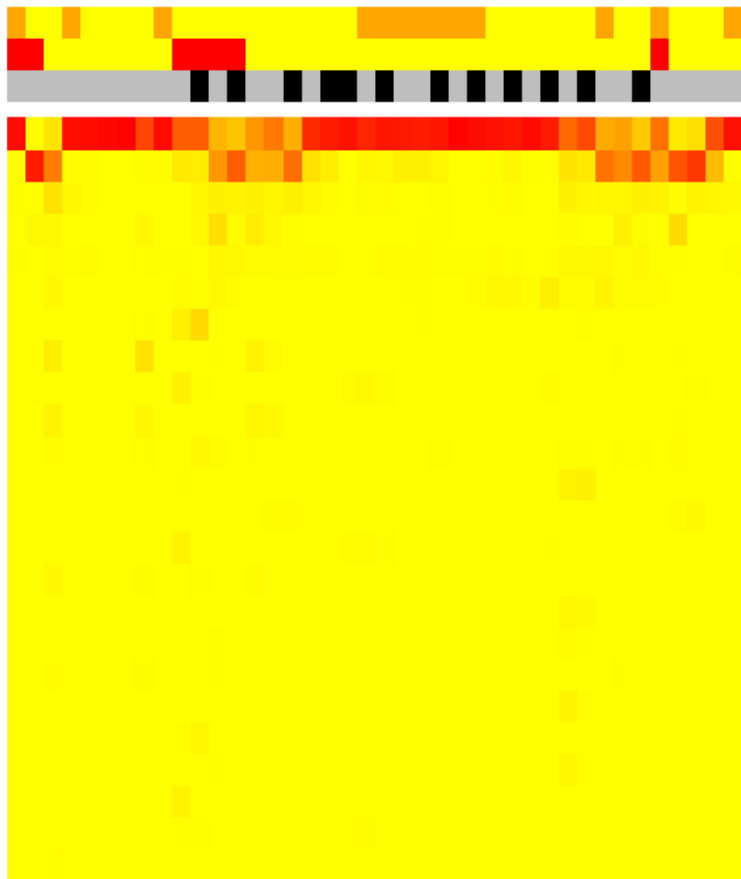

- Lactobacillus crispatus
- Lactobacillus iners
- Lactobacillus jensenii
- Prevotella bivia
- Lactobacillus vaginalis
- Lactobacillus gasseri
- Pseudomonas
- Dialister
- Gardnerella vaginalis
- Prevotella disiens
- Fingoldia magna
- Streptococcus salivarius
- None
- Megasphaera
- Prevotella genogroup 2
- Streptococcus
- Ureaplasma
- Dialister sp. type 1
- Veillonella
- Proteobacteria
- Veillonella parvula
- Leptotrichia amnionii
- Prevotella genogroup 1
- Peptoniphilus harei

### Color Key

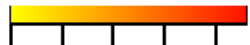

0 0.4 0.8

Relative abundance

VH10

Sex  
Menses  
Douching

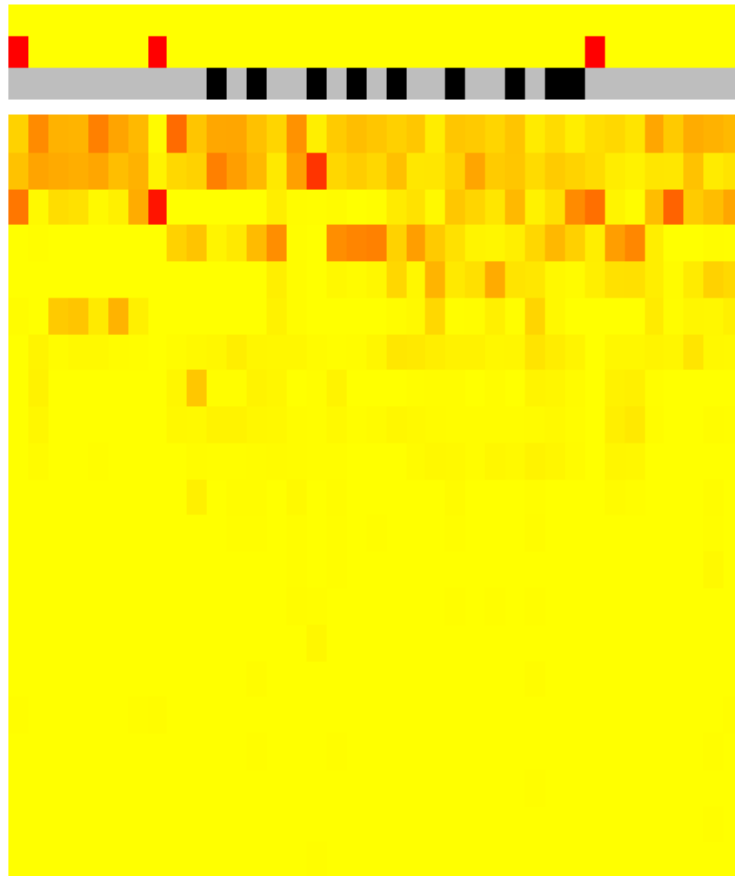

- Douching yes
- Douching no
- Menses yes
- Menses no
- Sex yes
- Sex no

Megasphaera  
Gardnerella vaginalis  
Lactobacillus iners  
Leptotrichia amnionii  
candidate division TM7  
BVAB1  
Atopobium vaginae  
Prevotella bivia  
Eggerthella  
BVAB2  
Prevotella genogroup 2  
Dialister sp. type 2  
Prevotella  
Anaerococcus  
Streptococcus anginosus  
Bacteroides  
None  
Prevotella disiens  
Parvimonas micra  
Dialister  
Finegoldia magna

### Color Key

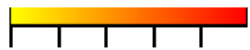

0 0.4 0.8

Relative abundance

VH11

Sex  
Menses  
Douching

- Douching yes
- Douching no
- Menses yes
- Menses no
- Sex yes
- Sex no

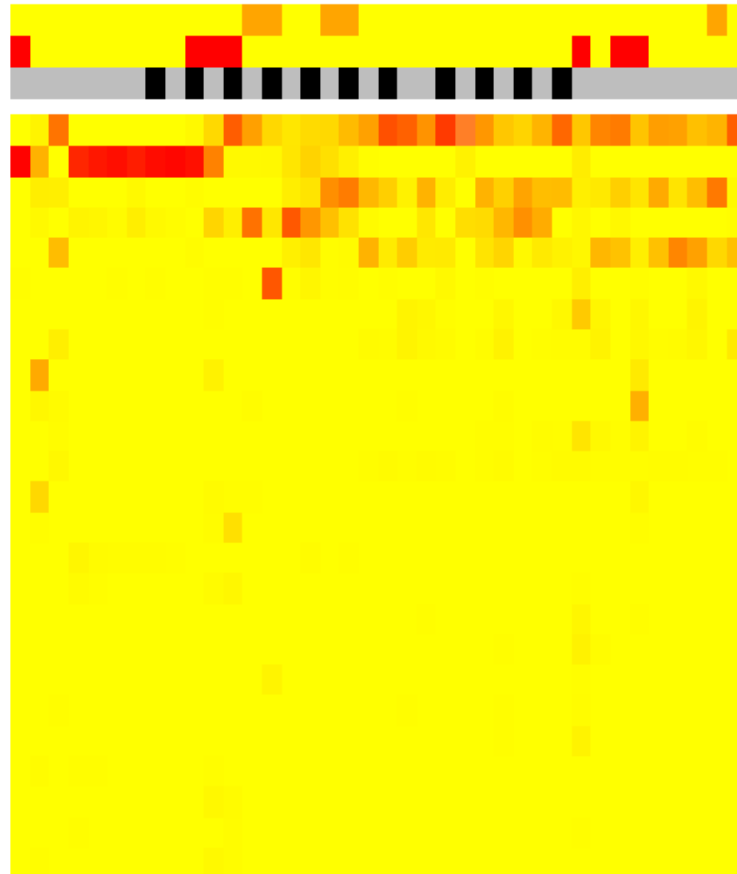

- Gardnerella vaginalis
- Lactobacillus crispatus
- Lactobacillus iners
- Lactobacillus jensenii
- Megasphaera
- Pseudomonas
- Prevotella bivia
- Eggerthella
- Enterobacteriaceae
- Veillonella
- Mycoplasma hominis
- Aerococcus
- Streptococcus
- Actinomycetales
- Lactobacillus vaginalis
- Finegoldia magna
- Parvimonas micra
- Prevotella melaninogenica
- Proteobacteria
- Dialister sp. type 1
- Dialister sp. type 2
- Ureaplasma
- Staphylococcus
- Peptoniphilus harei
- Streptococcus anginosus

### Color Key

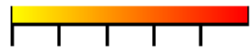

0 0.4 0.8

Relative abundance

## VH12

Sex  
Menses  
Douching

- Douching yes
- Douching no
- Menses yes
- Menses no
- Sex yes
- Sex no

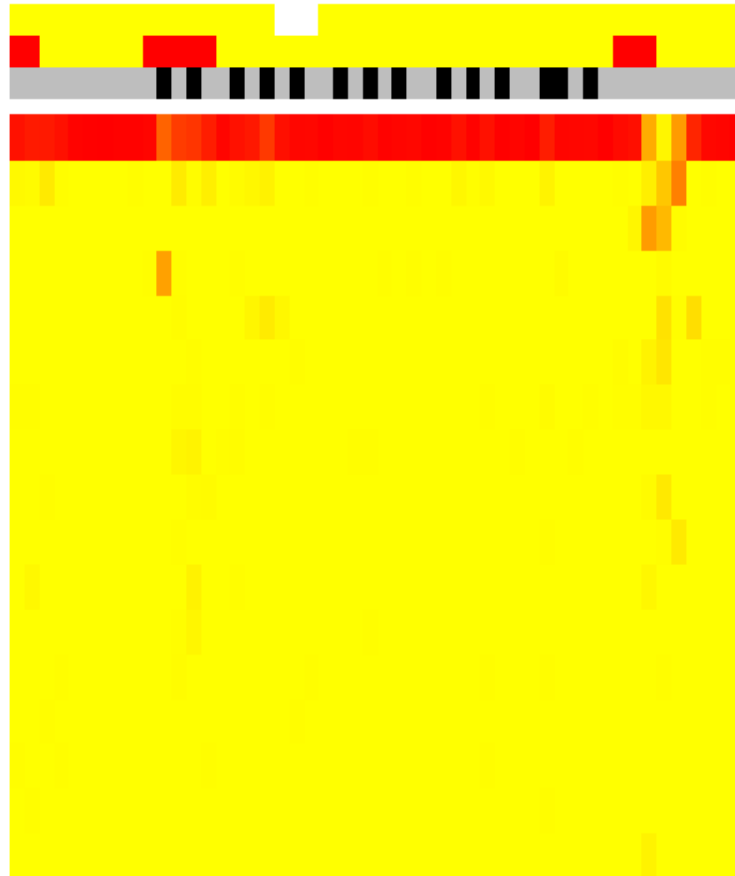

Lactobacillus iners  
Prevotella bivia  
Streptococcus  
Lactobacillus crispatus  
Streptococcus anginosus  
Staphylococcus  
Finegoldia magna  
Actinomycetales  
Enterobacteriaceae  
Dialister sp. type 1  
Actinomycetales  
Actinomycetales  
Dialister  
Ureaplasma  
Prevotella disiens  
Prevotella genogroup 2  
Enterococcus faecalis

### Color Key

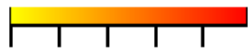

0 0.4 0.8

Relative abundance

# VH13

Sex  
Menses  
Douching

- Douching yes
- Douching no
- Menses yes
- Menses no
- Sex yes
- Sex no

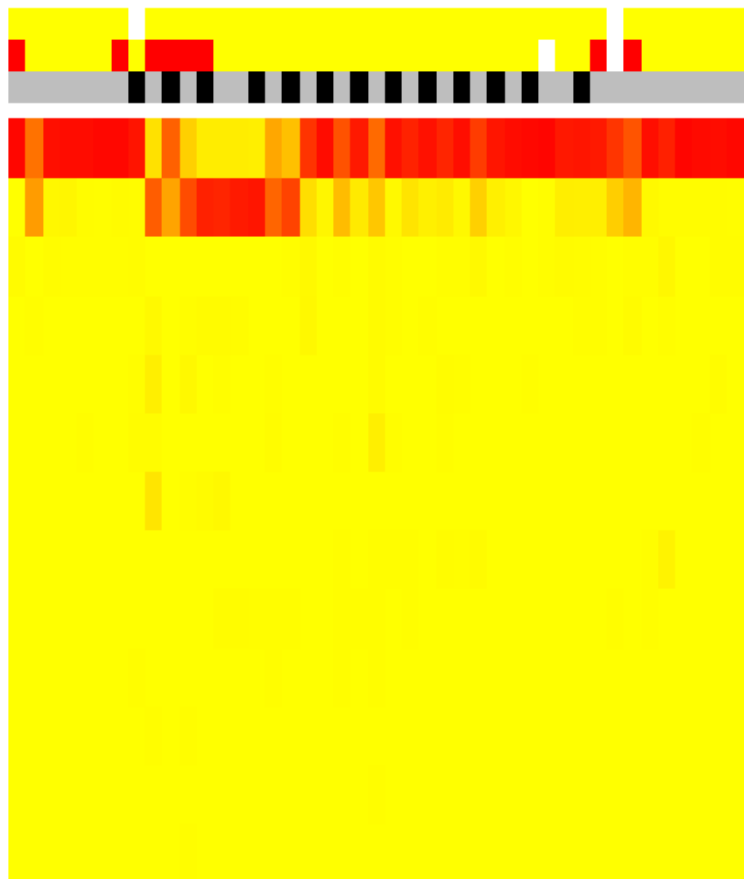

Lactobacillus crispatus  
Lactobacillus iners  
Lactobacillus jensenii  
Gardnerella vaginalis  
Veillonella  
Prevotella bivia  
Staphylococcus  
Lactobacillus gasseri  
Lactobacillus vaginalis  
Prevotella disiens  
Streptococcus anginosus  
Finegoldia magna  
Ureaplasma

### Color Key

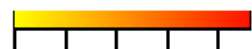

0 0.4 0.8

Relative abundance

VH14

Sex  
Menses  
Douching

- Douching yes
- Douching no
- Menses yes
- Menses no
- Sex yes
- Sex no

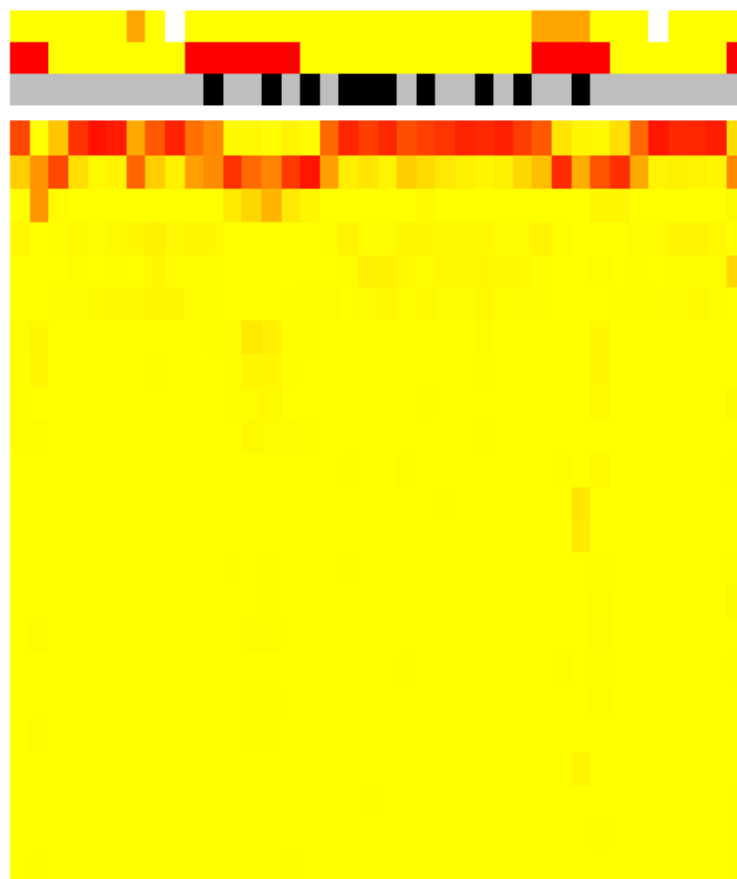

- Lactobacillus crispatus
- Lactobacillus iners
- Gardnerella vaginalis
- Lactobacillus jensenii
- Lactobacillus gasseri
- Lactobacillus vaginalis
- Veillonella
- Prevotella bivia
- Fingoldia magna
- Prevotella genogroup 2
- Staphylococcus
- Eubacterium
- Roseburia intestinalis
- Peptoniphilus harei
- Anaerococcus
- Peptostreptococcus
- Actinomycetales
- Streptococcus anginosus
- Atopobium vaginae
- Porphyromonas
- Bacteroides
- Ureaplasma
- Prevotella disiens

### Color Key

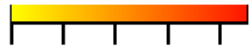

0 0.4 0.8

Relative abundance

# VH15

Sex  
Menses  
Douching

- Douching yes
- Douching no
- Menses yes
- Menses no
- Sex yes
- Sex no

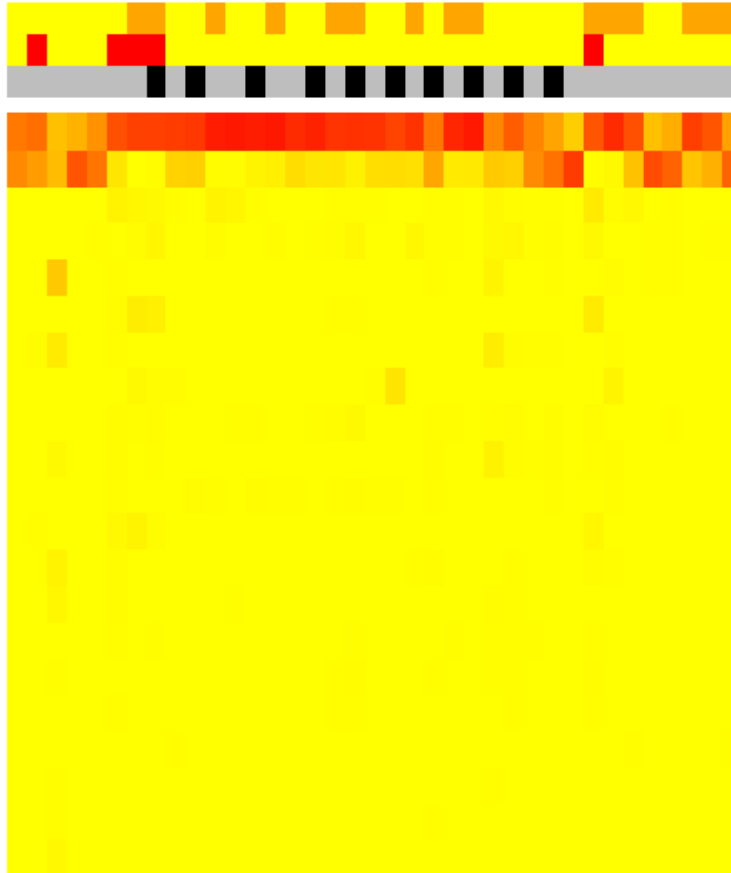

- Lactobacillus iners
- Lactobacillus jensenii
- Veillonella
- Streptococcus anginosus
- Prevotella disiens
- Streptococcus
- Prevotella bivia
- Lactobacillus crispatus
- Fingoldia magna
- Prevotella genogroup 2
- Lactobacillus coleohominis
- Peptostreptococcus
- Bacteroides
- Dialister sp. type 2
- Anaerococcus vaginalis
- Anaerococcus
- Peptoniphilus harei
- Lactobacillus
- Dialister sp. type 1
- Dialister
- Bacteroides

### Color Key

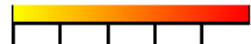

0 0.4 0.8

Relative abundance

# VH16

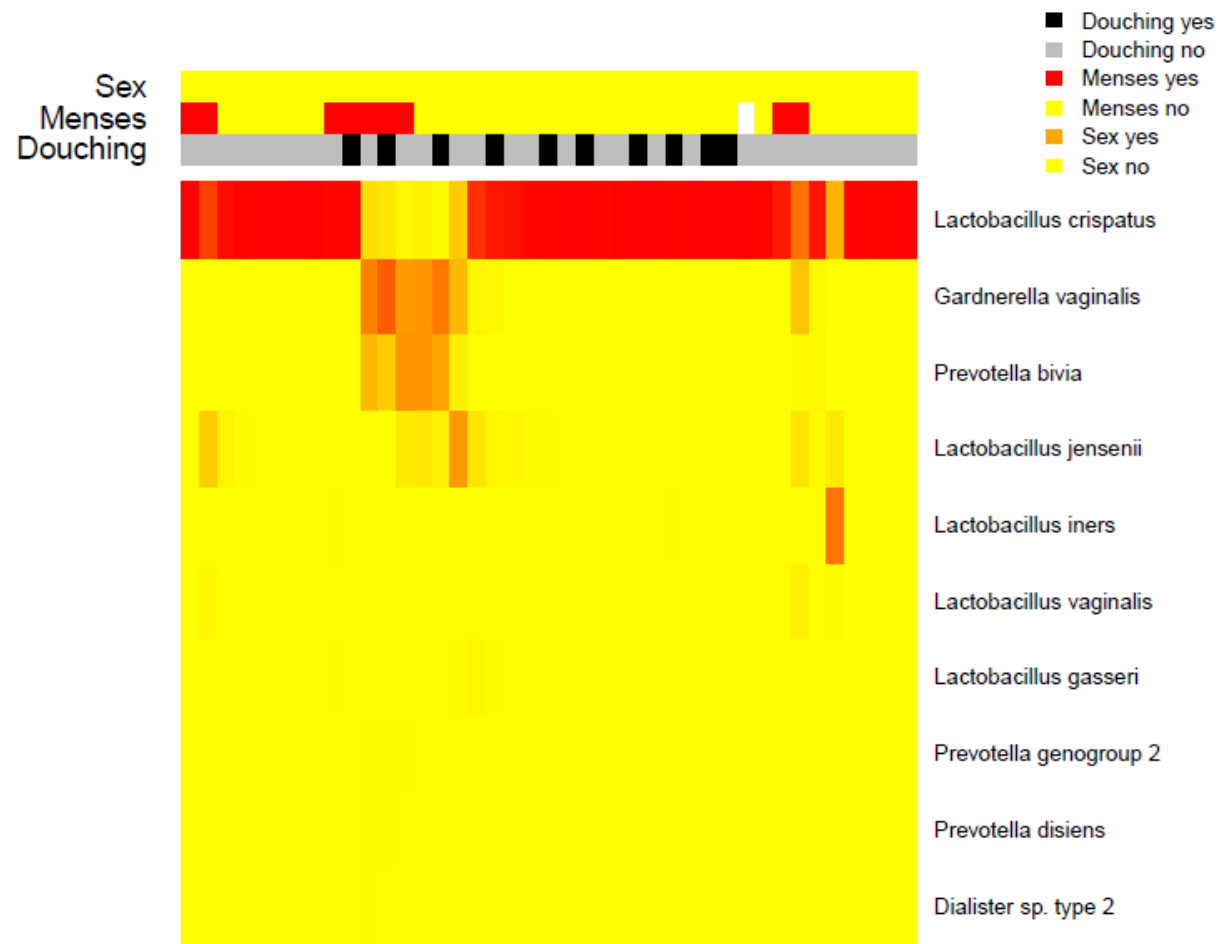



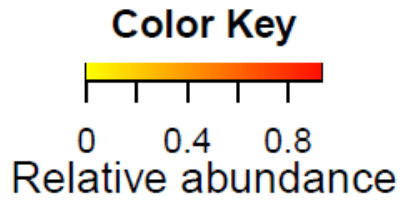

VH17

Sex  
Menses  
Douching

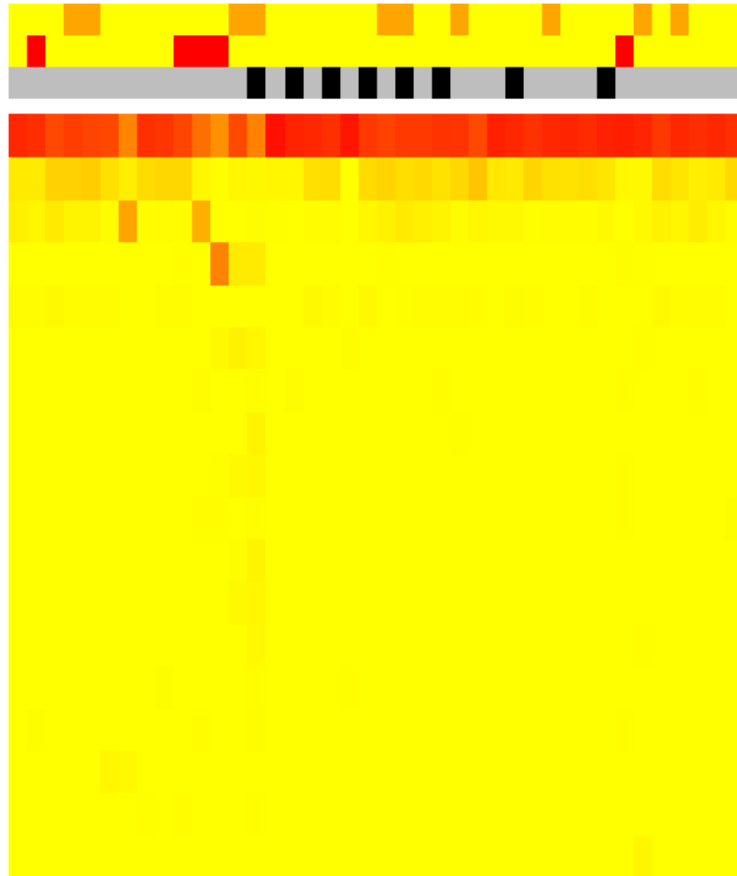

- Douching yes
- Douching no
- Menses yes
- Menses no
- Sex yes
- Sex no

Lactobacillus iners  
Lactobacillus jensenii  
Lactobacillus crispatus  
Prevotella bivia  
Lactobacillus vaginalis  
Streptococcus anginosus  
Actinomycetales  
Staphylococcus  
Peptostreptococcus  
Atopobium vaginae  
Prevotella  
Prevotella genogroup 2  
Bacteroides  
Dialister sp. type 1  
Finegoldia magna  
Roseburia intestinalis  
Dialister sp. type 2  
Enterobacteriaceae

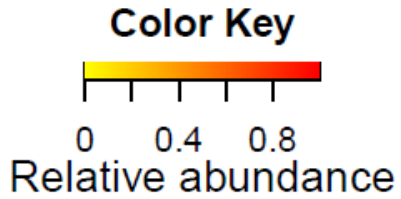

VH20

Sex  
Menses  
Douching

- Douching yes
- Douching no
- Menses yes
- Menses no
- Sex yes
- Sex no

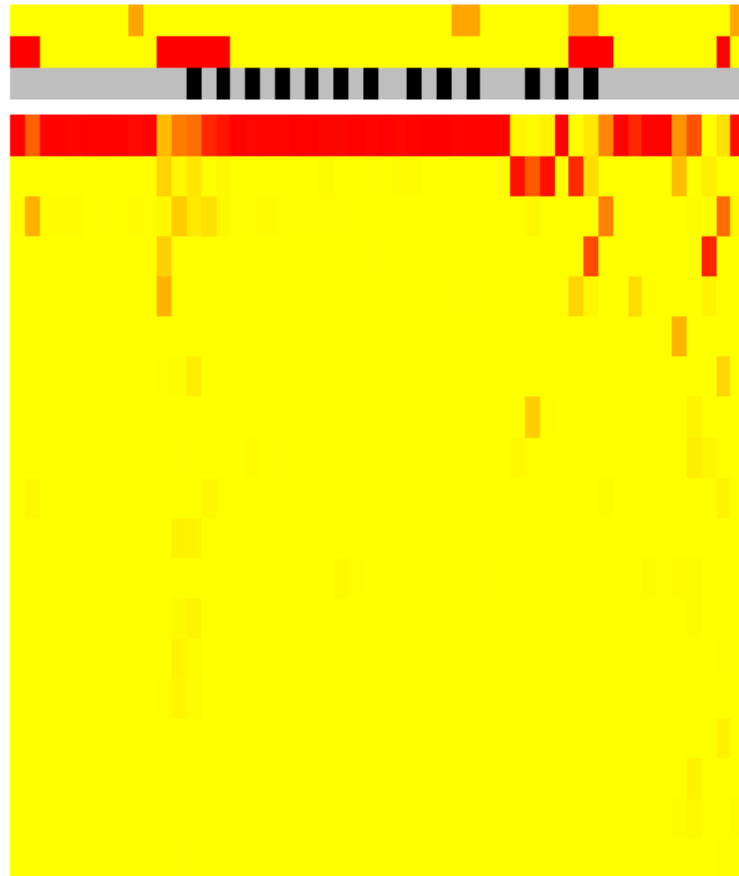

- Lactobacillus iners
- Enterococcus faecalis
- Gardnerella vaginalis
- Enterobacteriaceae
- Staphylococcus
- Actinobacteridae
- Veillonella
- BVAB1
- Lactobacillus crispatus
- Aerococcus
- Peptostreptococcus
- Lactobacillus coleohominis
- Prevotella genogroup 2
- Anaerococcus
- Anaerococcus vaginalis
- Prevotella bivia
- candidate division TM7
- Lactobacillus vaginalis
- Ureaplasma

### Color Key

VH21

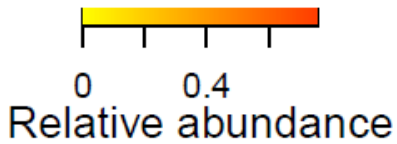

Sex  
Menses  
Douching

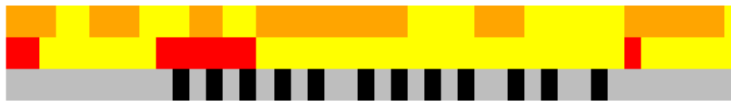

- Douching yes
- Douching no
- Menses yes
- Menses no
- Sex yes
- Sex no

- BVAB1
- Gardnerella vaginalis
- Leptotrichia amnionii
- candidate division TM7
- Atopobium vaginae
- BVAB2
- Lactobacillus iners
- Megasphaera
- Prevotella genogroup 3
- Dialister sp. type 2
- Prevotella genogroup 2
- Eggerthella
- Megasphaera sp. type 2
- Prevotella genogroup 1
- Mobiluncus curtisii
- Fusobacterium nucleatum
- Parvimonas micra
- Clostridiales
- Gemella
- Peptoniphilus lacrimalis
- BVAB3
- Bacteroides
- Prevotella genogroup 7
- Peptostreptococcus
- Porphyromonas uenonis
- Peptoniphilus hareii
- Dialister sp. type 1
- Dialister
- Peptoniphilus asaccharolyticus
- Prevotella bivia
- Clostridiales Family XI. Incertae Sedis
- Anaerococcus
- Porphyromonas
- Lactobacillus jensenii
- Staphylococcus
- Aerococcus
- Prevotella buccalis
- Finegoldia magna
- Lactobacillus crispatus

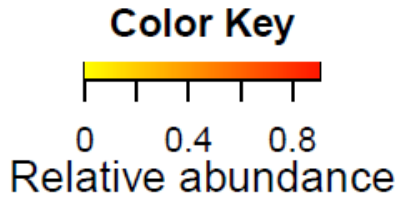

VH23

Sex  
Menses  
Douching

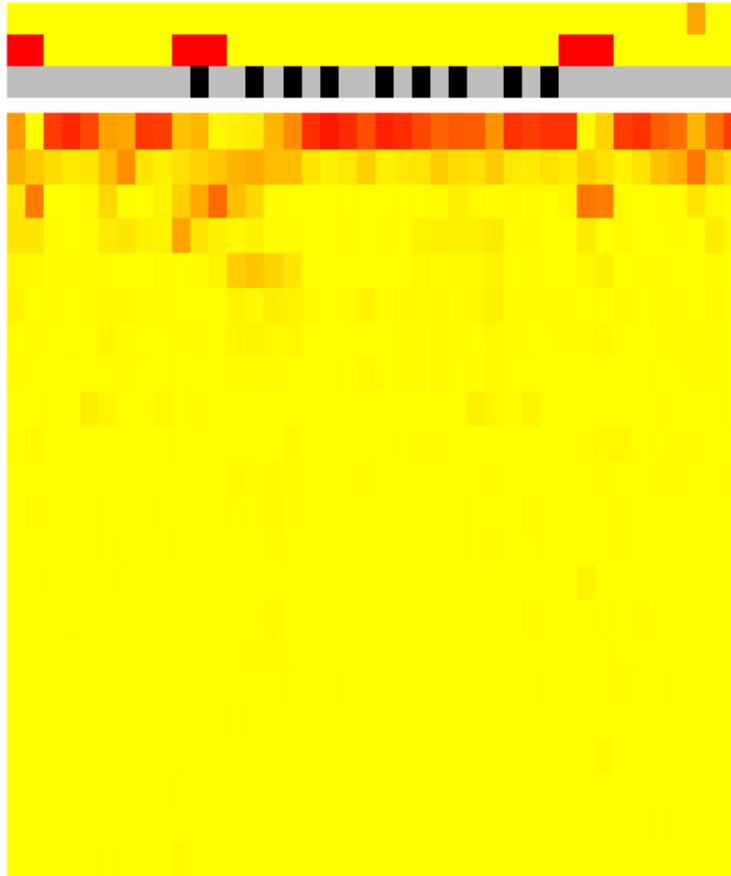

- Douching yes
- Douching no
- Menses yes
- Menses no
- Sex yes
- Sex no

BVAB1  
Gardnerella vaginalis  
Lactobacillus iners  
Megasphaera  
Prevotella bivia  
BVAB2  
Atopobium vaginae  
Eggerthella  
Prevotella genogroup 2  
Leptotrichia amnionii  
Parvimonas micra  
Dialister sp. type 2  
Prevotella buccalis  
Aerococcus  
Porphyromonas uenonis  
Dialister sp. type 1  
Peptoniphilus lacrimalis  
Gemella  
Peptostreptococcus  
Megasphaera  
Mycoplasma hominis  
Lactobacillus crispatus

### Color Key

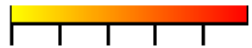

0 0.4 0.8

Relative abundance

VH24

Sex  
Menses  
Douching

- Douching yes
- Douching no
- Menses yes
- Menses no
- Sex yes
- Sex no

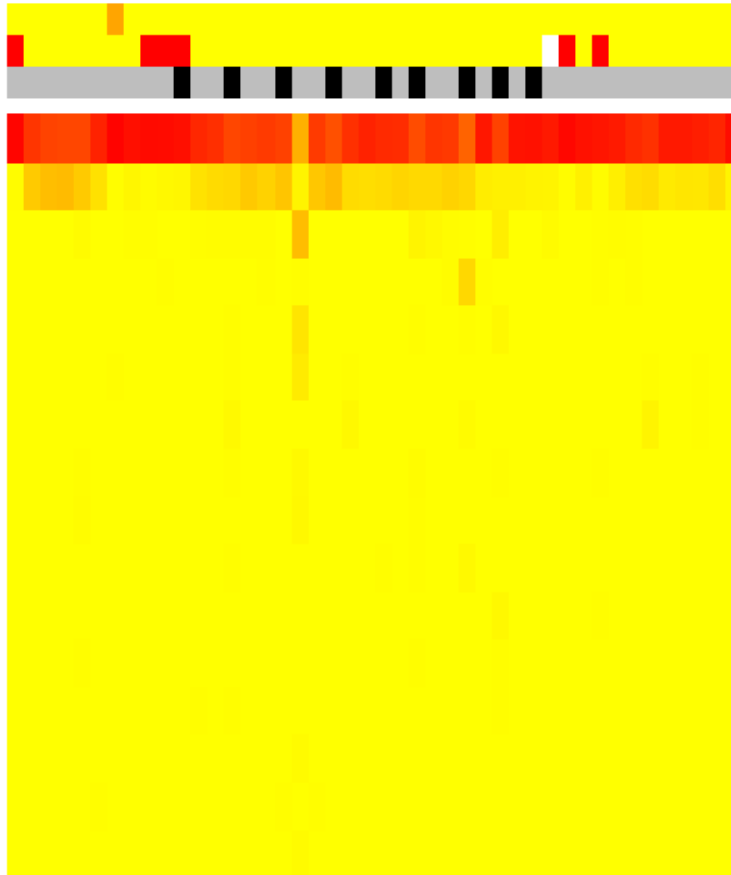

- Lactobacillus iners
- Lactobacillus jensenii
- Prevotella genogroup 2
- Lactobacillus crispatus
- Fingoldia magna
- Gardnerella vaginalis
- BVAB1
- Peptoniphilus harei
- Anaerococcus
- Lactobacillus gasseri
- Bacteroides
- Dialister sp. type 2
- Bacteroides
- Peptoniphilus lacrimalis
- Lactobacillus
- Clostridiales Family XI. Incertae Sedis

### Color Key

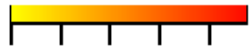

0 0.4 0.8

Relative abundance

VH25

Sex  
Menses  
Douching

- Douching yes
- Douching no
- Menses yes
- Menses no
- Sex yes
- Sex no

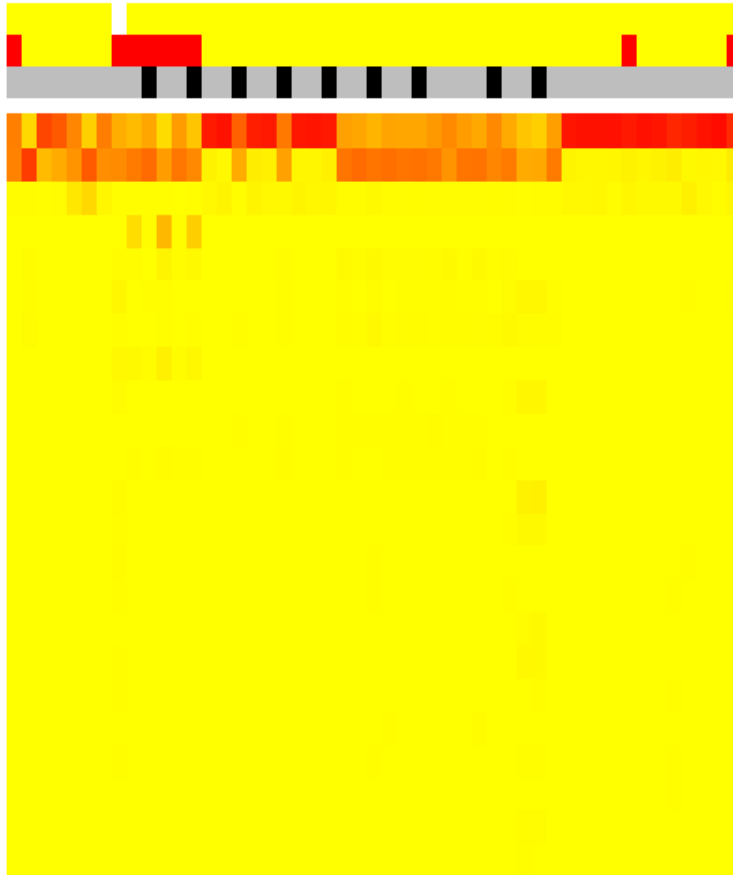

- Lactobacillus crispatus
- Lactobacillus iners
- Lactobacillus jensenii
- Enterobacteriaceae
- Streptococcus anginosus
- Fingoldia magna
- Lactobacillus gasseri
- Staphylococcus
- Peptoniphilus harei
- Lactobacillus vaginalis
- Prevotella bivia
- Actinomycetales
- Anaerococcus
- Ureaplasma
- Dialister
- Campylobacter ureolyticus
- Actinomycetales
- Prevotella genogroup 2
- Veillonellaceae
- Bacteroides
- Dialister sp. type 1
- Clostridiales Family XI. Incertae Sedis
- Anaerococcus vaginalis

### Color Key

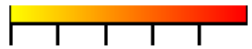

0 0.4 0.8

Relative abundance

VH26

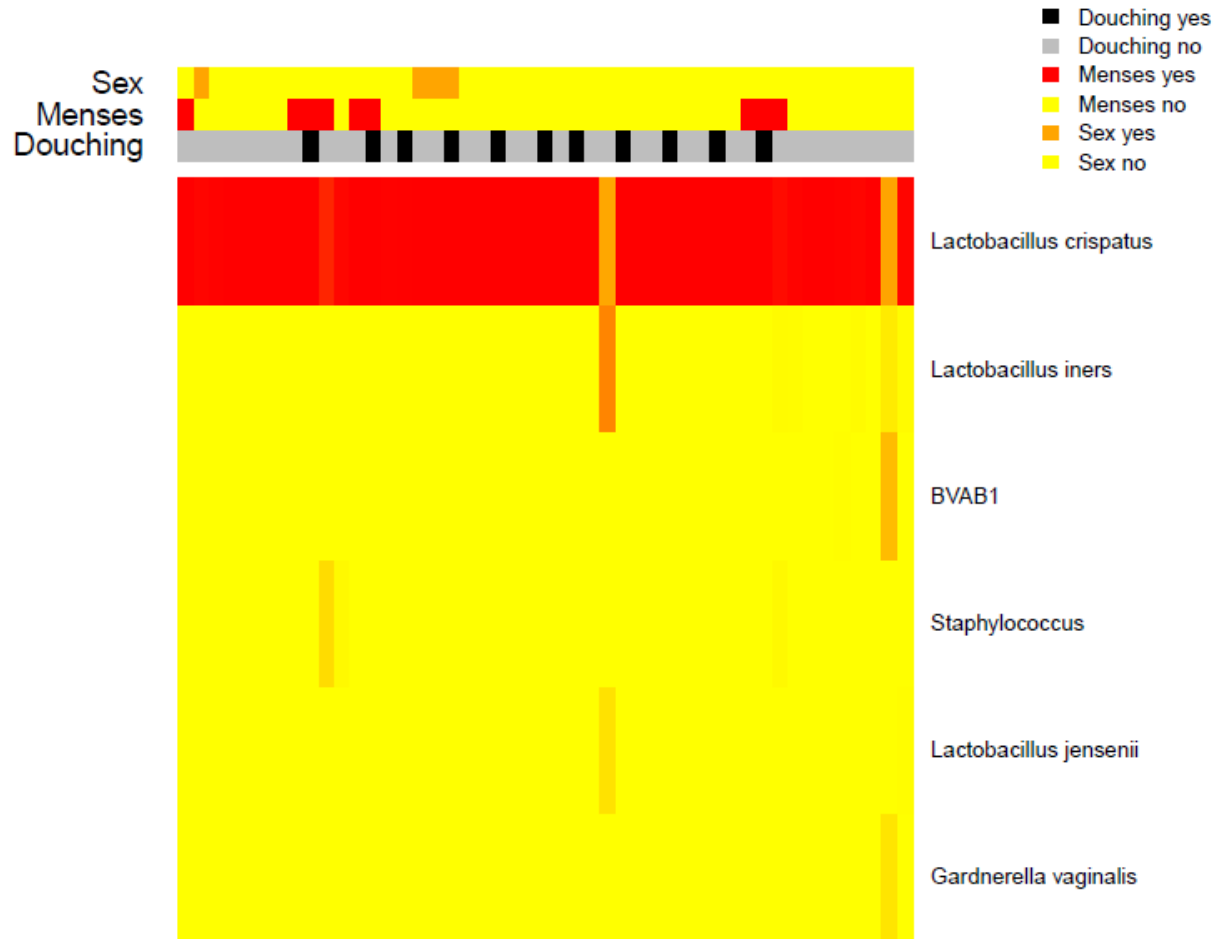

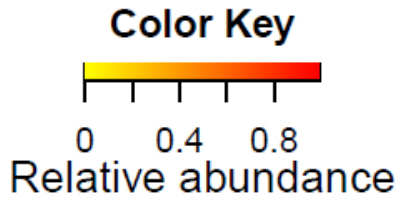

VH28

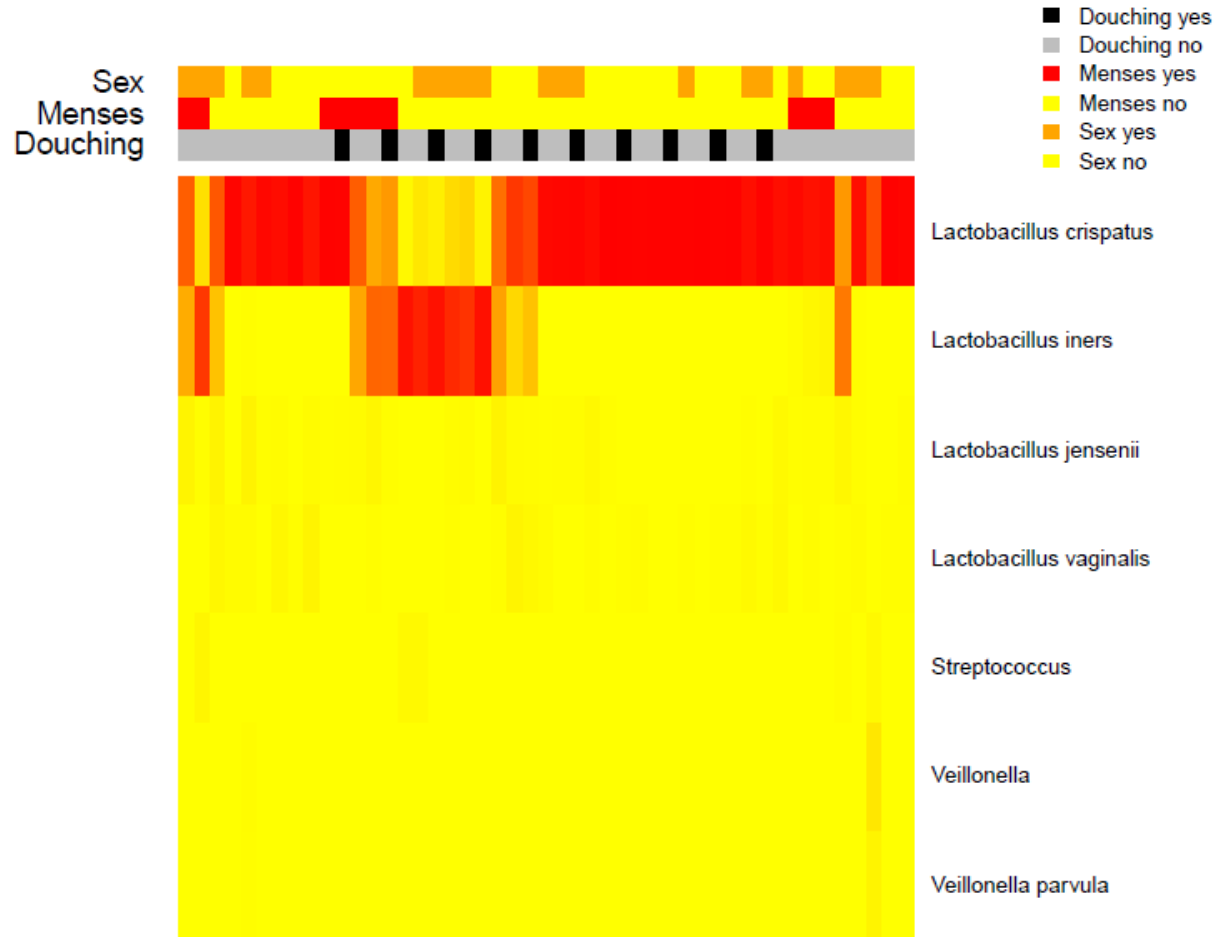



### Color Key

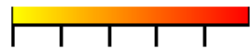

0 0.4 0.8

Relative abundance

# VH29

Sex  
Menses  
Douching

- Douching yes
- Douching no
- Menses yes
- Menses no
- Sex yes
- Sex no

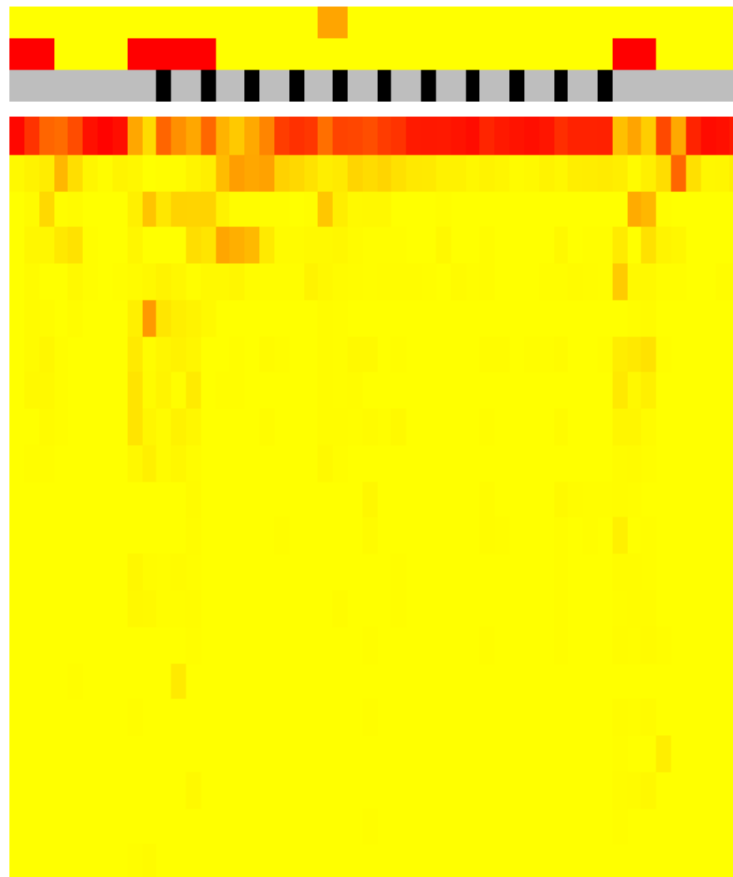

- Lactobacillus crispatus
- Lactobacillus jensenii
- Gardnerella vaginalis
- Lactobacillus gasseri
- Ureaplasma
- Streptococcus anginosus
- Prevotella bivia
- Veillonella
- Finnegoldia magna
- Peptostreptococcus
- Dialister
- Bacteroides
- Peptoniphilus harei
- Anaerococcus vaginalis
- Prevotella genogroup 2
- Enterobacteriaceae
- Dialister sp. type 1
- Lactobacillus iners
- Dialister sp. type 2
- Prevotella disiens
- Anaerococcus
