# Supplementary material for: Effects of an over-the-counter lactic-acid containing intra-vaginal douching product on the vaginal microbiota
Source: PubMed Central journal article supplement (PMC6659218; doi:10.1186/s12866-019-1545-0), 2019-07-25

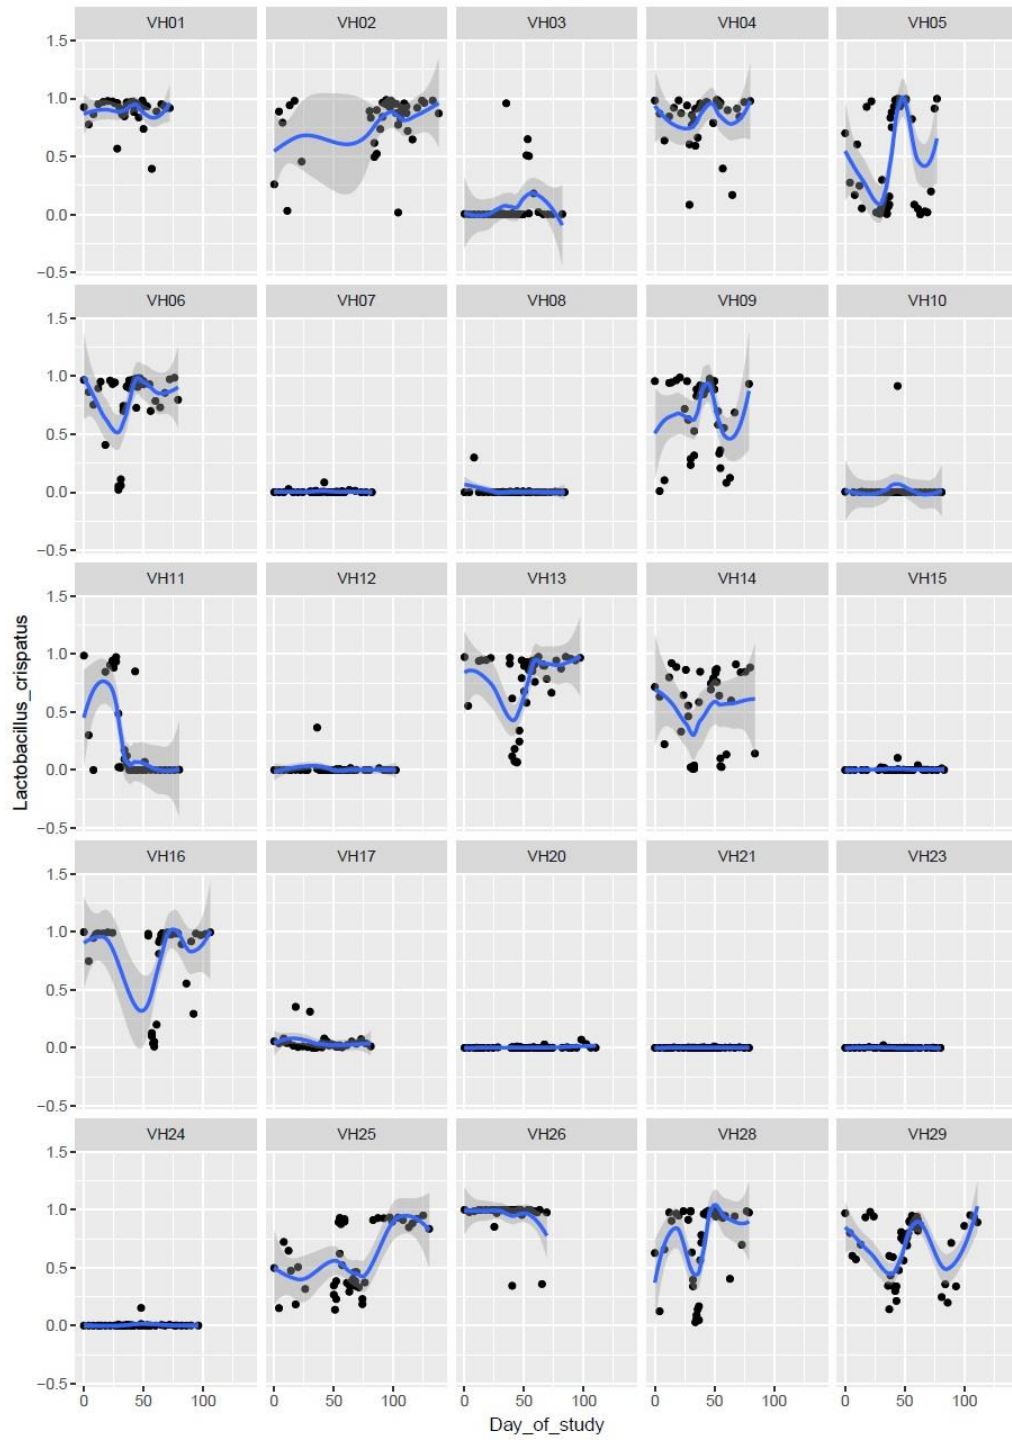

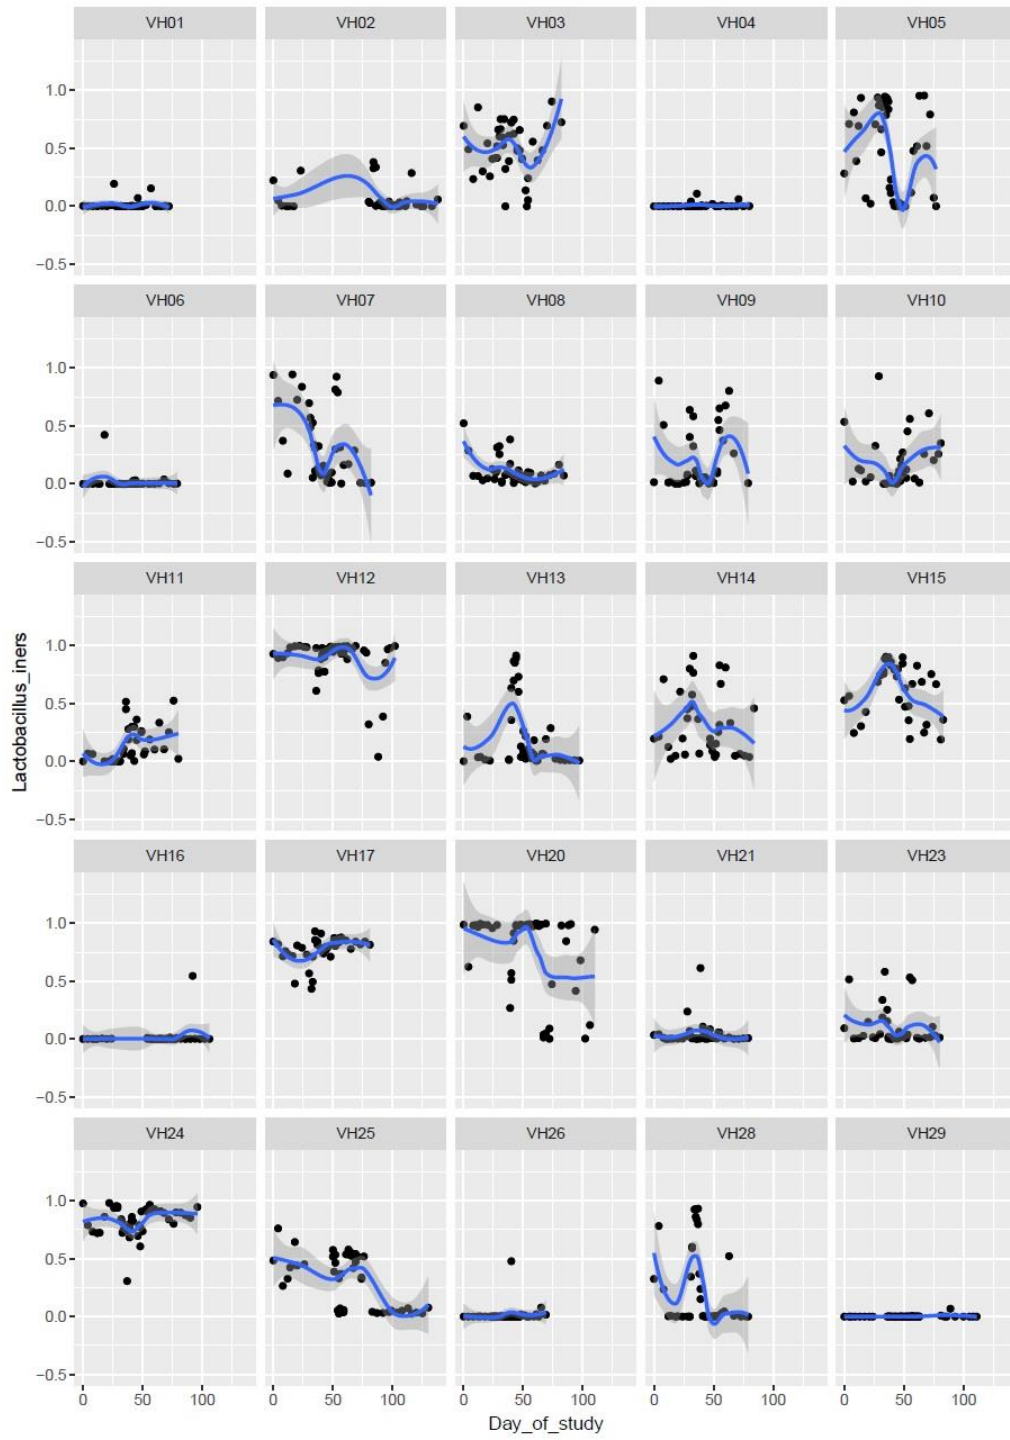

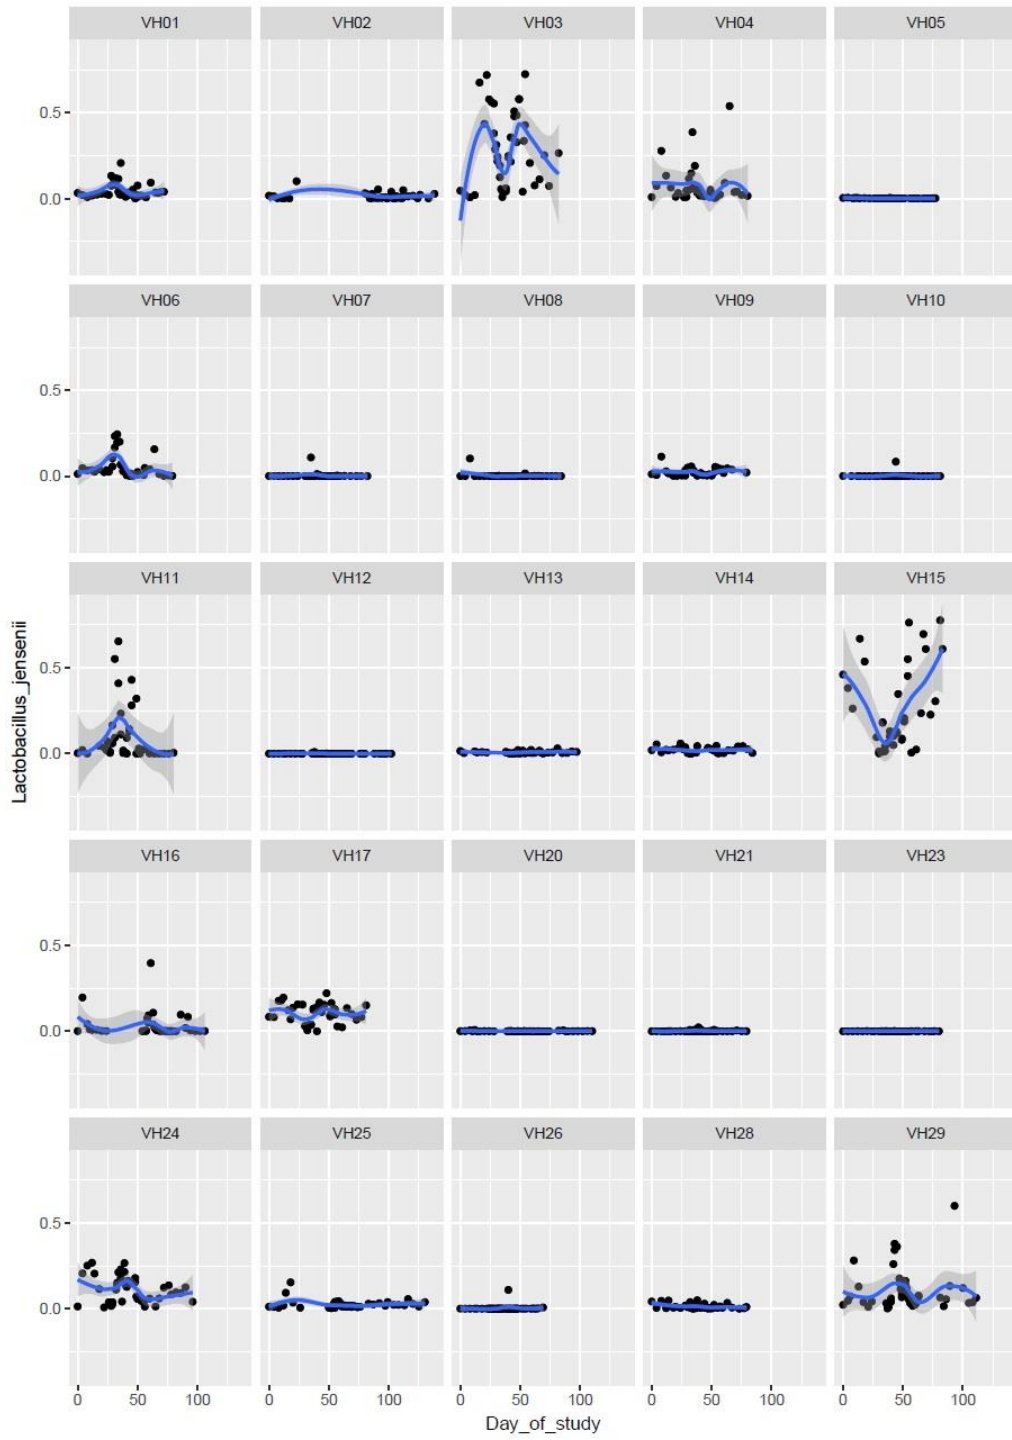

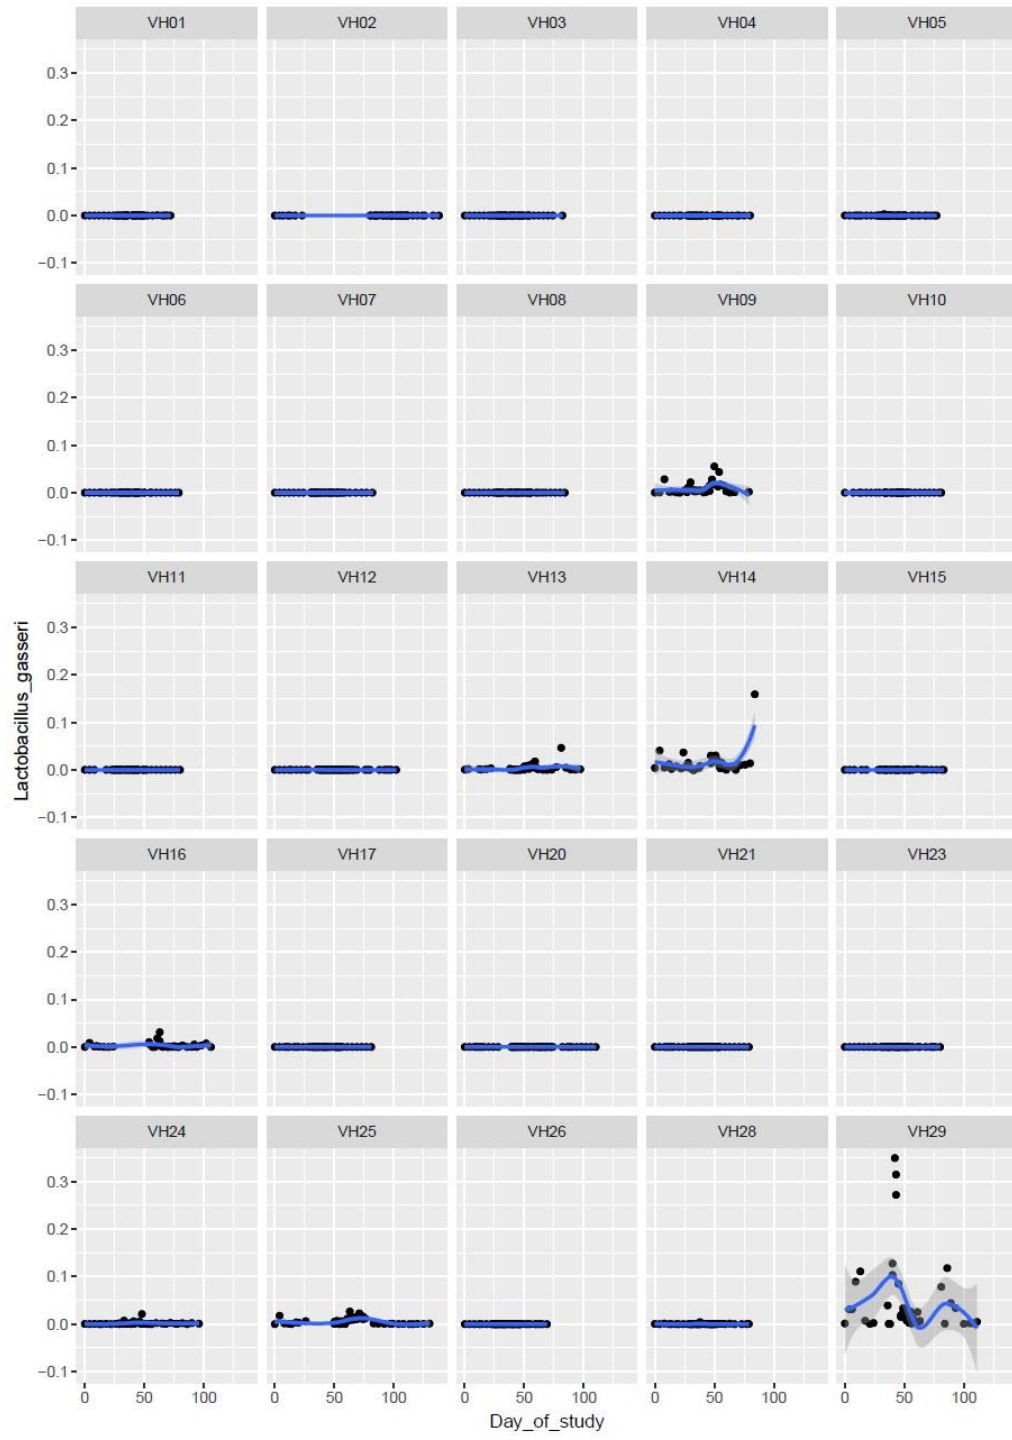

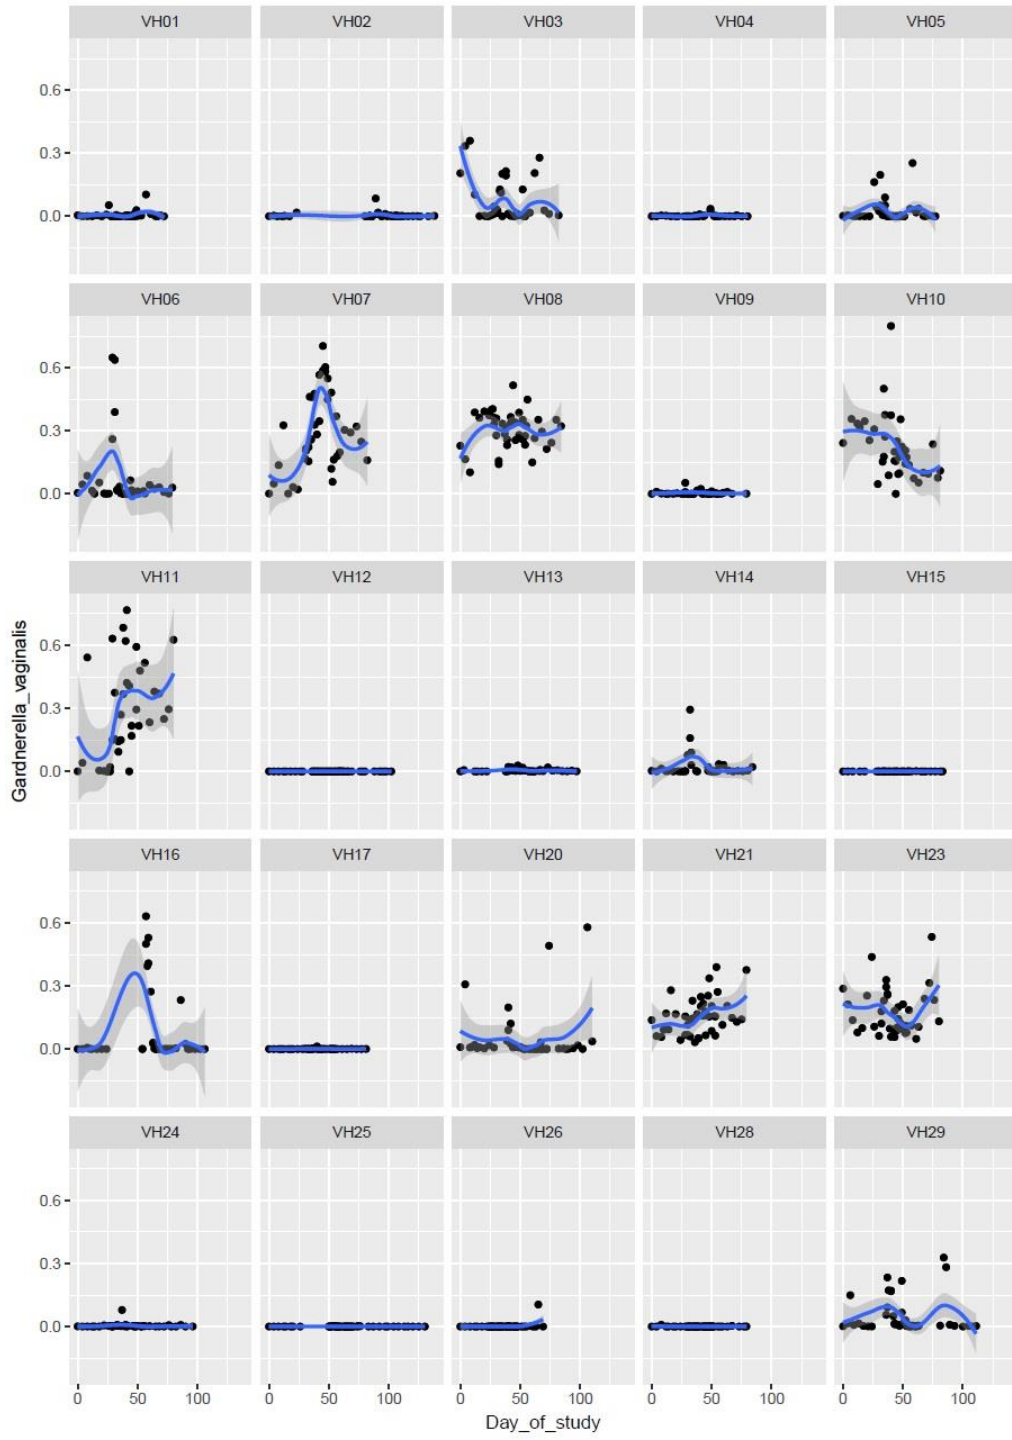

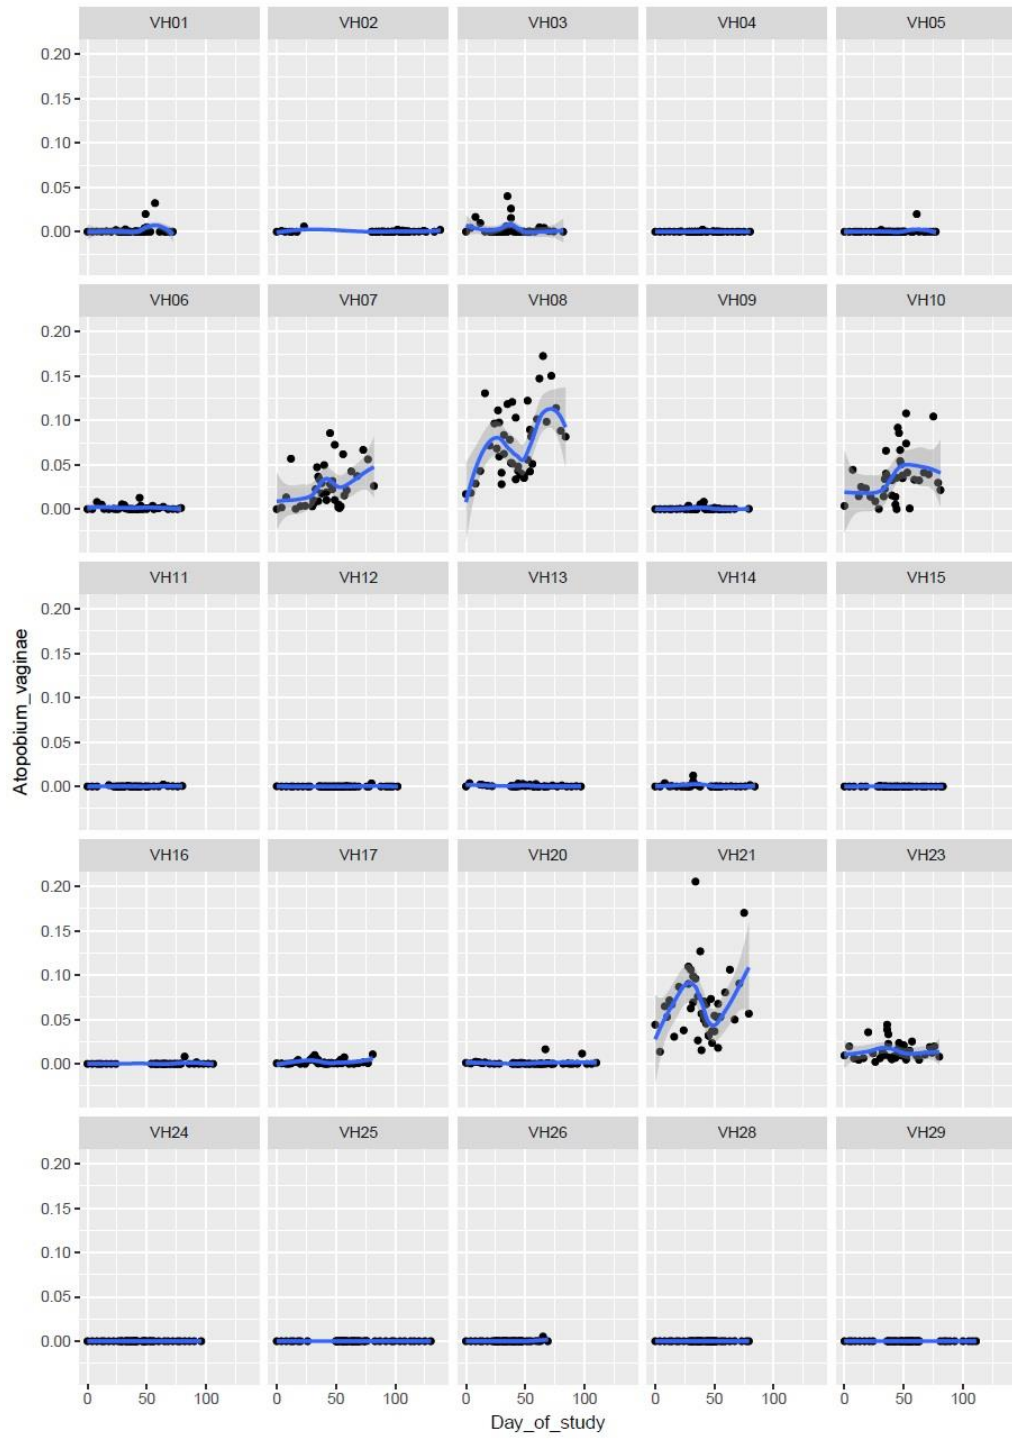

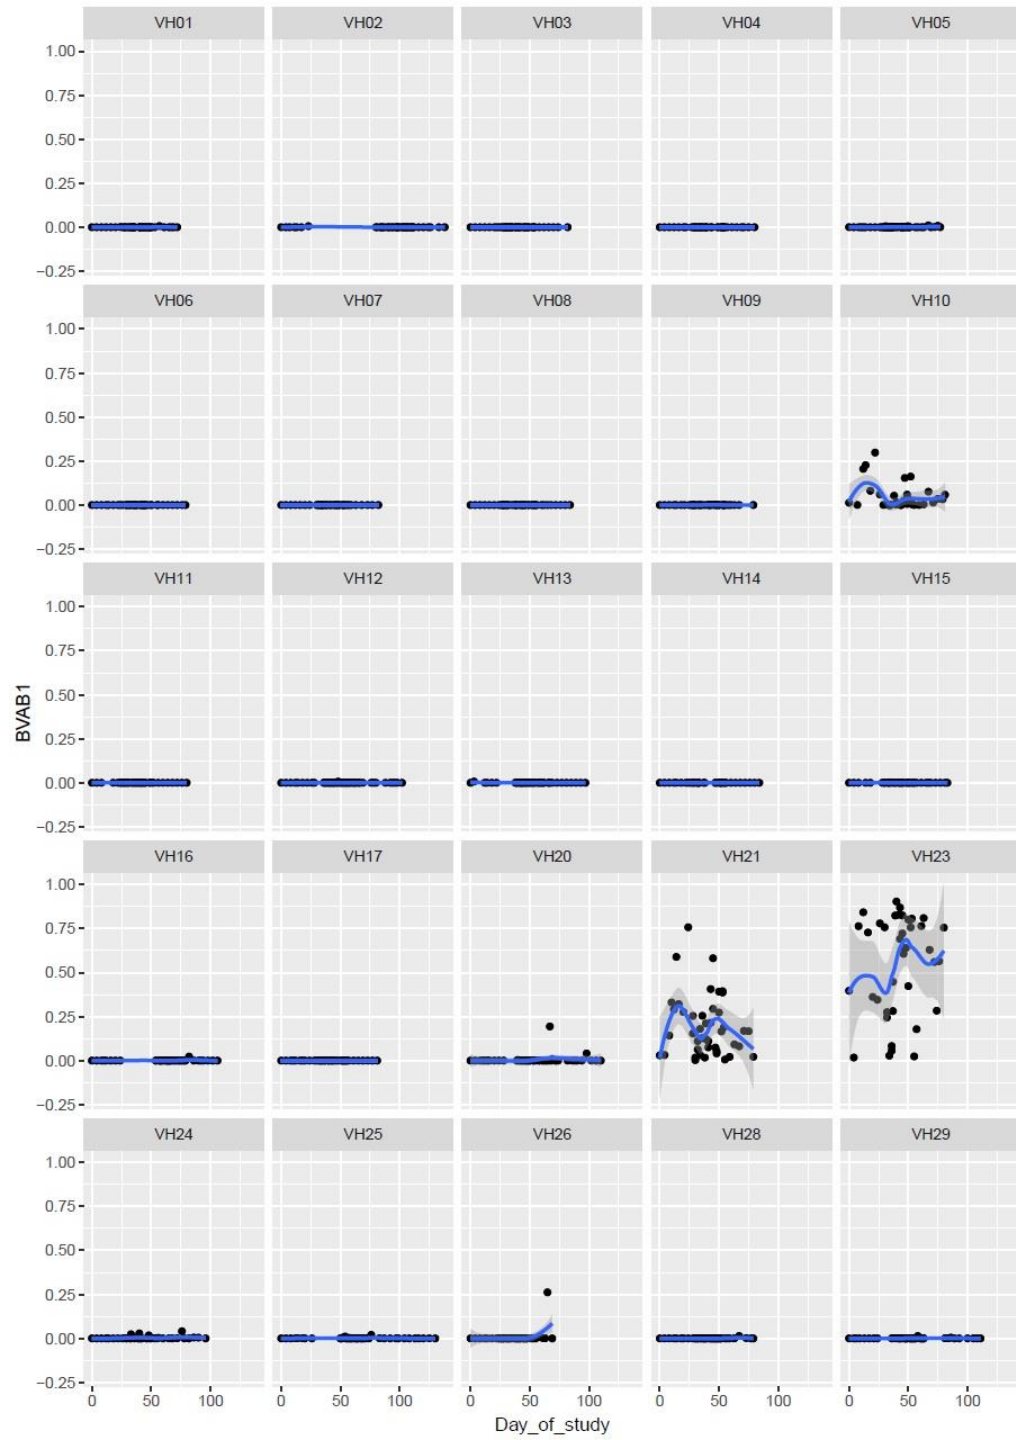

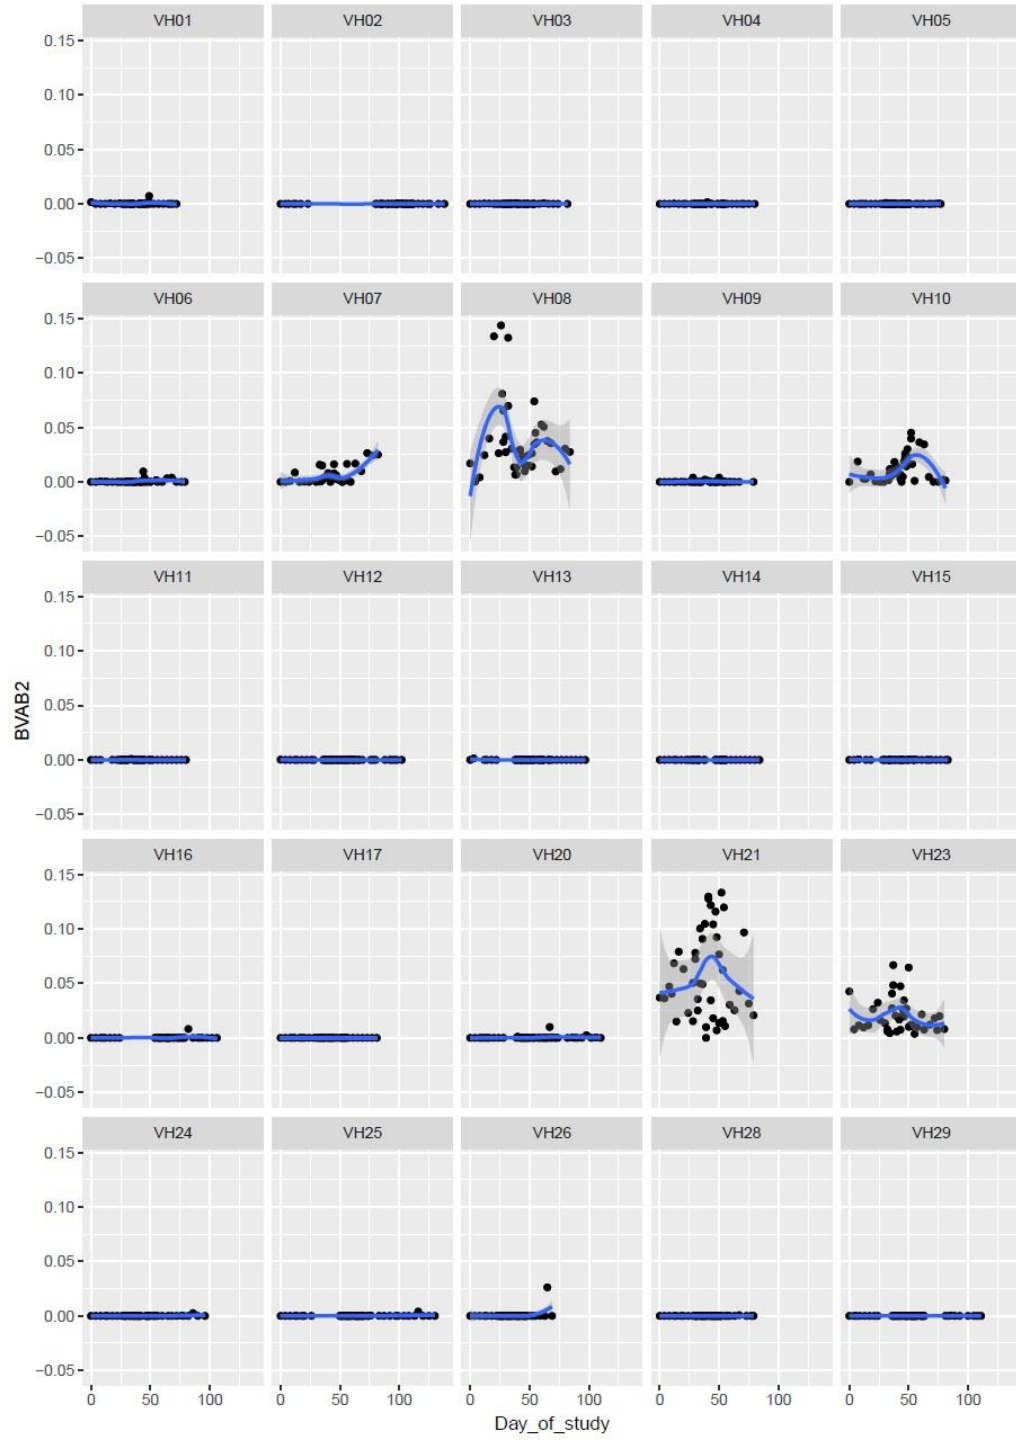



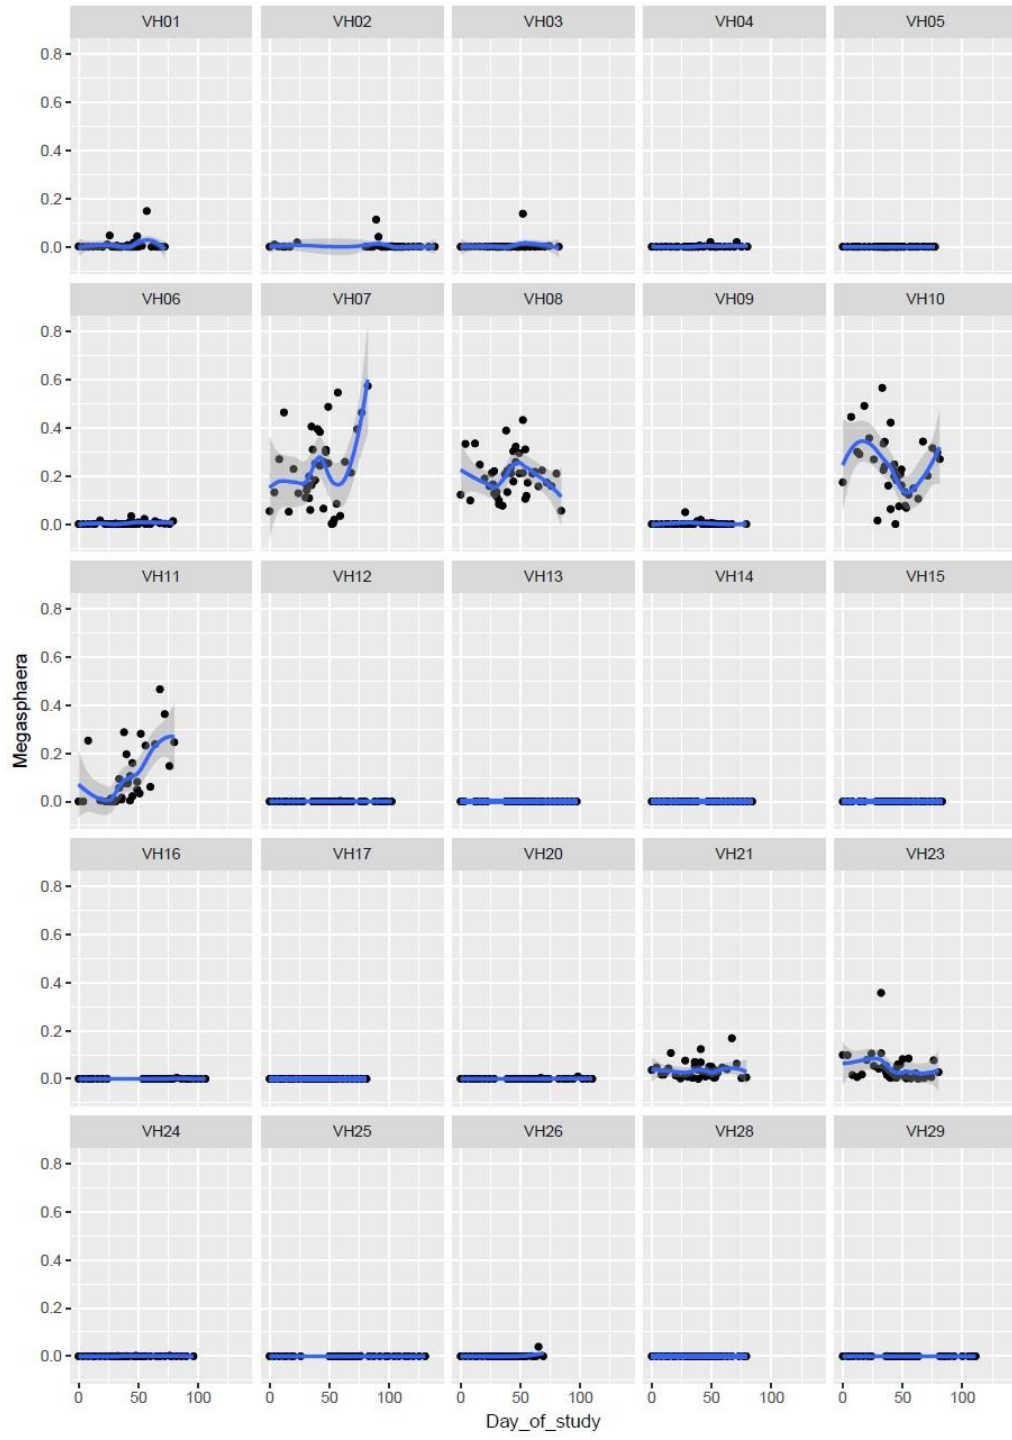

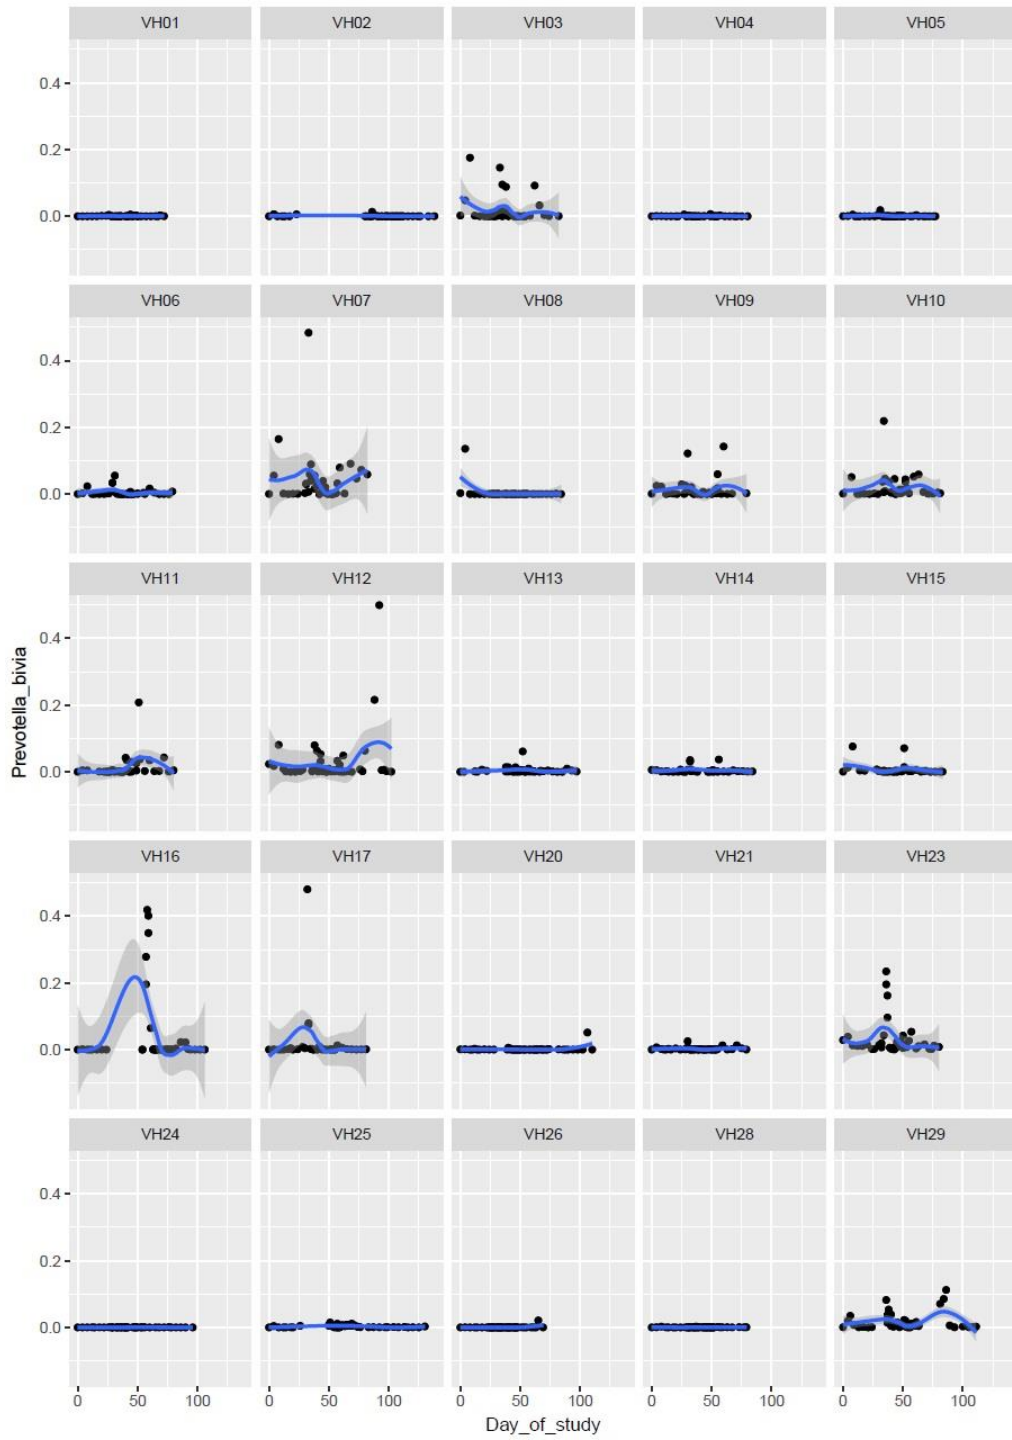

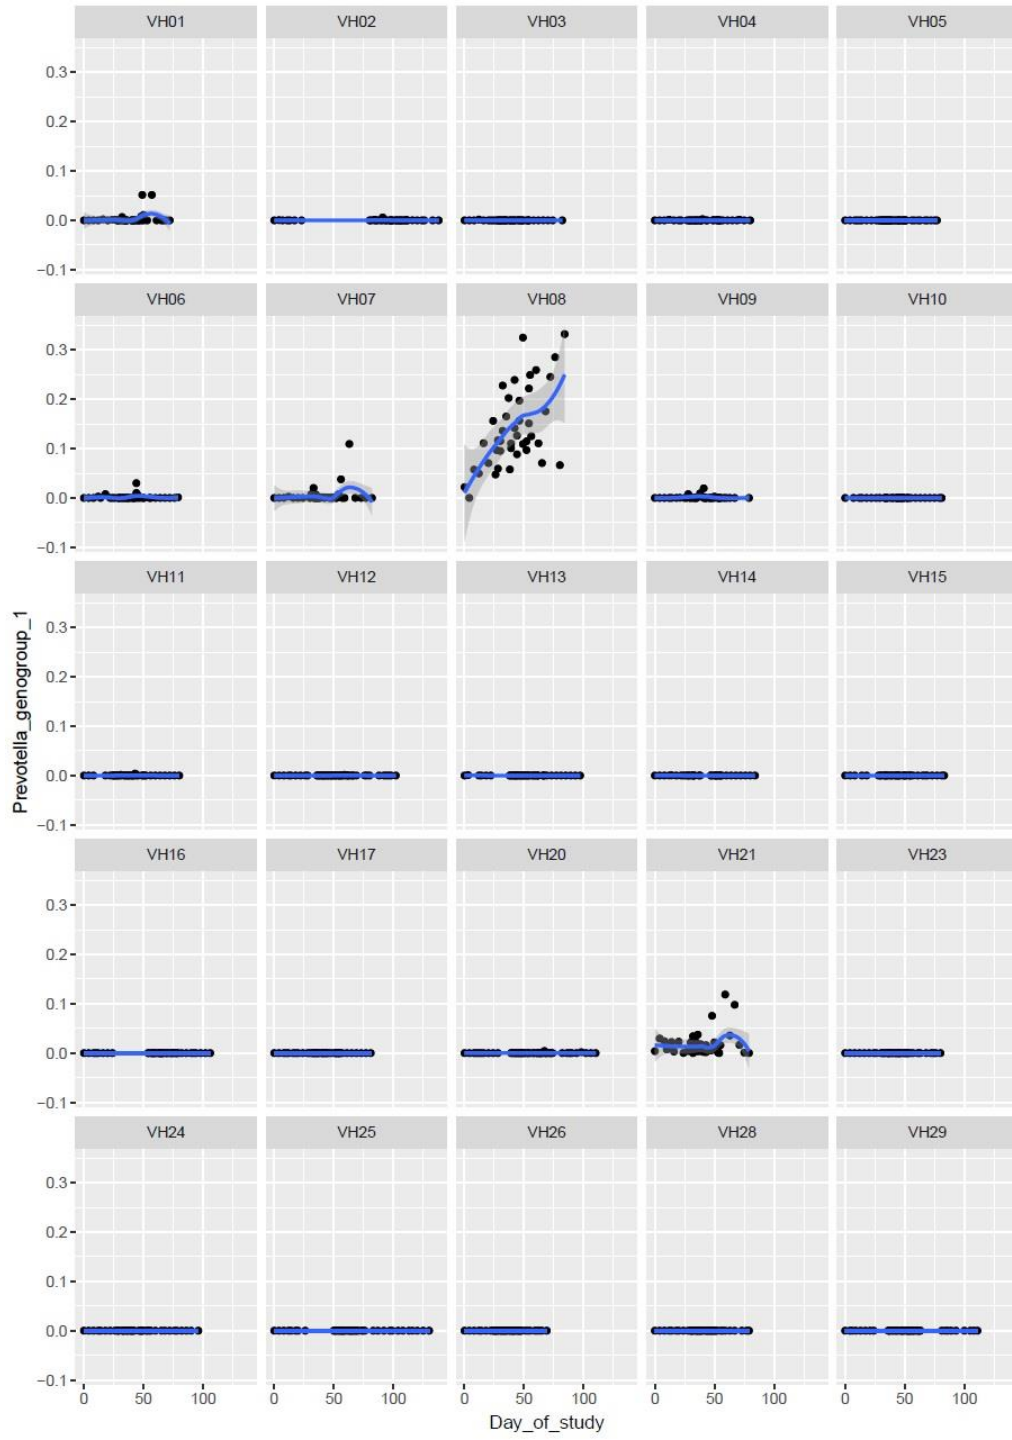

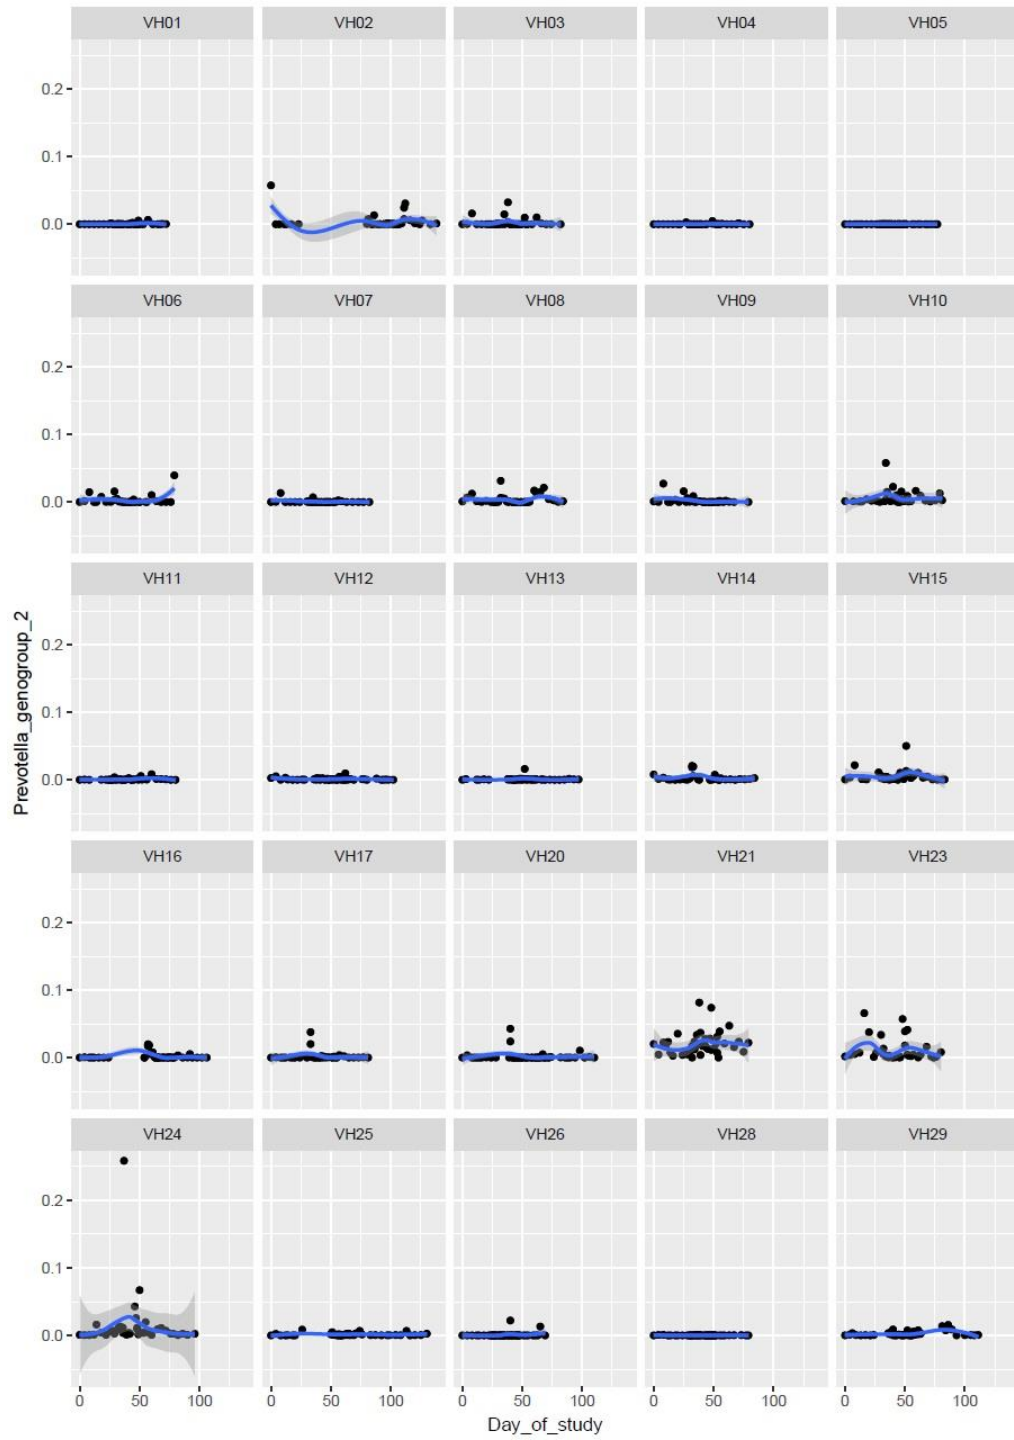

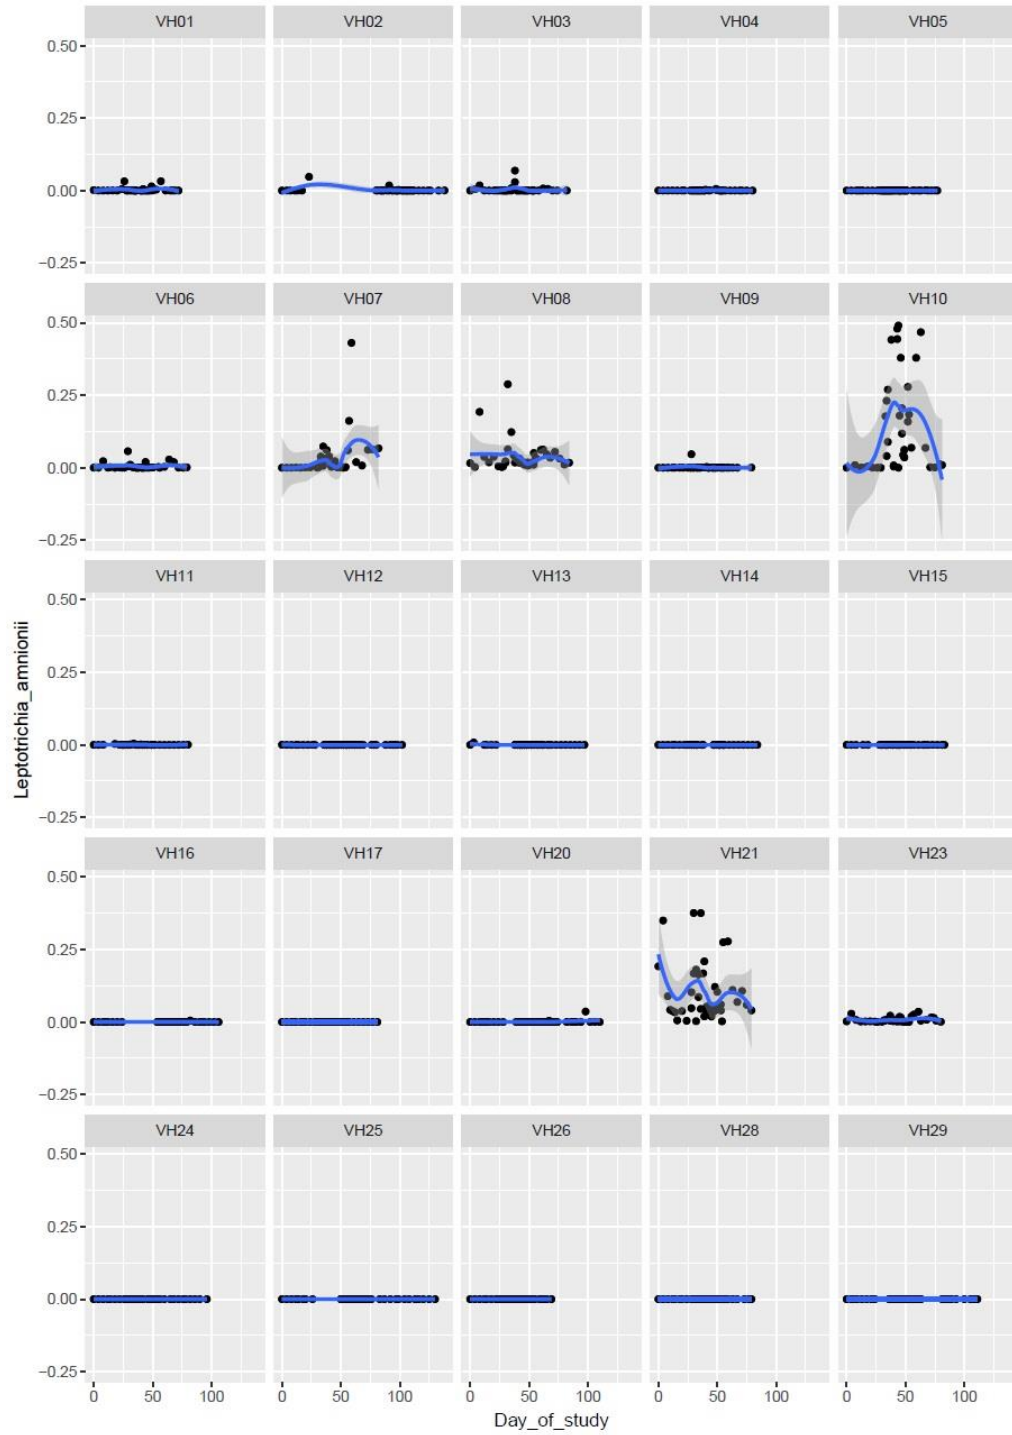

Supplement: 12866_2019_1545_MOESM4_ESM.pdf [file 12866_2019_1545_MOESM4_ESM.pdf]
