# Supplementary material for: Effects of an over-the-counter lactic-acid containing intra-vaginal douching product on the vaginal microbiota
Source: BMC Microbiol. 2019 Jul 25;19:168. doi: 10.1186/s12866-019-1545-0 (PMC6659218; doi:10.1186/s12866-019-1545-0)
Supplement: Supplementary file 2 — Clinical and microbioligical outcomes. (XLSX 25 kb) [file 12866_2019_1545_MOESM2_ESM.xlsx]

## Sheet: Table 1_Overview clinical
Overview clinical findings of study participants.
id	Cycle1_1	Cycle1_2	Cycle2_1	Cycle2_2	Cycle2_3	Cycle3_1	Cycle3_2	T1_KOH_amine	T2_KOH_amine	T3_KOH_amine	T1_clue_cells	T2_clue_cells	T3_clue_cells	Nugent_T1	Nugent_T2	Nugent_T3
VH01	4	4	4	4	4	4	4	neg	neg	neg	no	no	no	BV-	BV-	BV-
VH02	4	4	4	4	4	4	4	neg	neg	neg	no	no	missing	BV-	BV-	missing
VH03	4	5	4	4	4	4	4	neg	neg	neg	no	no	no	BV-	BV-	BV-
VH04	4	4	4	4	4	4	4	neg	neg	neg	no	no	no	BV-	BV-	BV-
VH05	4	4	4	4	4	4	4	neg	neg	neg	no	no	no	BV-	BV-	BV-
VH06	4	4	4	4	4	4	4	pos	neg	neg	no	no	no	intermediate	BV-	BV-
VH07	4	4	4	4	4	4	4.7	neg	neg	neg	no	no	no	BV-	intermediate	intermediate
VH08	4	5.3	5.3	5	5.8	4	5	neg	neg	pos	yes	yes	yes	BV+	BV+	BV+
VH09	4	4	4	4	4	4	4	neg	neg	neg	no	no	no	BV-	BV-	BV-
VH10	5.5	5	5.3	5.5	5.5	5.5	5.5	neg	neg	neg	yes	yes	yes	BV+	BV+	BV+
VH11	4	4	4	5.3	5.3	5.3	5.3	neg	neg	neg	no	no	yes	BV-	BV-	BV+
VH12	4	4	4	4	4	4	4	neg	neg	neg	no	no	no	BV-	BV-	BV-
VH13	4	4	4	4	4	4	4	neg	neg	neg	no	no	no	BV-	BV-	BV-
VH14	5.8	5	4	4	4	4	4	neg	neg	neg	missing	no	no	BV-	BV-	BV-
VH15	4	4	4	4	4	4	4	neg	neg	neg	no	no	no	BV-	BV-	BV-
VH16	4	4	4	4	4	4	4	neg	neg	neg	no	no	no	BV-	BV-	BV-
VH17	5.3	4.4	5.4	4	4	4	4	neg	neg	neg	no	no	no	BV-	BV-	BV-
VH20	4	4	4	4	4	4	4	neg	neg	neg	no	no	no	BV-	BV-	BV-
VH21	4	5	5.5	5.8	5.8	5.5	5.3	neg	pos	neg	no	yes	no	BV+	BV+	intermediate
VH23	5.3	5	4.4	5.3	5.3	5	5	neg	neg	neg	no	no	no	BV+	BV+	BV+
VH24	4	4	4.4	4	4	4	4	neg	neg	neg	no	no	no	BV-	BV-	BV-
VH25	4	4	4	4	4	4	4	neg	neg	neg	no	no	no	BV-	BV-	BV-
VH26	5	5	4.7	4	4	4.1	4	neg	neg	neg	no	no	no	BV-	BV-	missing
VH28	4	4	4	4	4	4	4	neg	neg	neg	no	no	no	BV-	missing	BV-
VH29	4	4	4	4	4	4	4	neg	neg	neg	no	no	no	intermediate	BV-	BV-
Note:
The participants visited the STI clinic just before the start of each menstrual cycle where they were seen by a nurse who measured the vaginal pH, collected vaginal smears for Nugent scoring and performed a KOH whiff test.
The participants were also instructed to take a pH measurement mid cycle at home using vaginal acidity test gloves (CarePlan VpH, UK, Bedford).

## Sheet: Table 2_pH unvariable analysis
Univariable logistic regression analysis of the association between intra-vaginal douching and having vaginal pH>4.5.
Study Cycle	No. of pH measurements	Vaginal pH >4,5
	N=175	OR* (95% CI)
First cycle (no douche)	50	Ref
Second cycle (douching)	75	1.5 (0.5 – 4.0)
Third cycle (wash-out)	50	1.8 (0.8 – 4.0)
* Adjusted for multiple (within subject) measurements using generalized estimating equations and referenced to vaginal pH<4,5.

## Sheet: Table 3_Nugent univariable
Univariable multinomial logistic regression analysis of the association between intra-vaginal douching and BV status by Nugent score.
Study Cycle	No. of vaginal smears	Intermediate (Nugent score: 4-6)	BV (Nugent score: 7-10)
	N=72	OR* (95% CI)	OR* (95% CI)
First cycle (no douche)	25	Ref	Ref
Second cycle (douching)	24**	0.5 (0.0 – 7.9)	1.0 (0.8 – 1.2)
Third cycle (wash-out)	22**	1.1 (0.1 – 11.1)	1.1 (0.5 – 2.7)
* Adjusted for multiple (within subject) measurements using generalized estimating equations and referenced to no BV (Nugent score: 0-3).
** Missing Nugent scores; n=1 for Cycle 2 and n=2 for Cycle 3.

## Sheet: Table 4_VM groups
Vaginal microbiota composition cluster description and group allocation.
VM group name	No. of samples per group	VM group description*
Lactobacillus crispatus – dominated	(n=418 samples)	≥ 90% Lactobacillus crispatus
Lactobacillus iners - dominated	(n=290 samples)	≥ 80% Lactobacillus iners
Diverse Lactobacilli	(n= 114 samples)	≥ 45% L. crispatus & ≥ 30% L. iners (n=79)
		≥ 50% L. jensenii & ≥ 30% L. iners (n=35)
Diverse anaerobes	(n= 239 samples)	≥ 50% G. vaginalis & diverse taxononomies (n=42)
		≥ 20% G. vaginalis & ≥ 20% Megasphaera & ≥ 10% Leptotrichia amnioni & ≥5% BVAB1 & ≥ 5% Atopobium vaginae ≥ 10% L. iners & diverse taxonomies (n=130)
		≥ 30% L. iners & ≥ 20% G. vaginalis & diverse taxonomies (n=27)
		≥ 75% BVAB1 (n=30)
		≥ 70% Enterobacteriaceae (2 different clusters; n=4)
		≥ 80% Enterococcus faecalis (n=4)
		≥ 30% Pseudomonas & ≥ 20% Streptococcus agalactiae & diverse taxonomies (n=2)
* Percentages are averaged microbial relative abundances per cluster.

## Sheet: Table 5_LMER
Association between douching and within-sample diversity (Shannon's diversity index)
ID	(Intercept)	Douche_yes	Menses_yes	Sex_yes	hormonal_contraception_yes
VH01	1709871	-0.001036456	0.19517400	0.13034956	0.033403035
VH02	1777775	-0.007791362	0.18675001	0.07092408	0.052762128
VH03	1768763	-0.006894862	0.15598235	0.08037863	0.033402972
VH04	1753358	-0.005362426	0.09049734	0.08548205	0.033402975
VH05	1742790	-0.004311121	0.15873578	0.06912472	0.056738940
VH06	1773887	-0.007404582	0.11306084	0.05711228	0.033402979
VH07	1758581	-0.005881955	0.09748417	0.09835420	0.033403002
VH08	1803701	-0.010370351	0.07453164	0.07888202	0.033402966
VH09	1767779	-0.006797002	0.05598503	0.04986695	0.033402952
VH10	1885592	-0.018516637	0.04789055	0.02608318	0.033402910
VH11	1784377	-0.008448106	0.01023083	0.06365260	0.033402946
VH12	1744076	-0.004439142	0.07205543	0.06132216	0.023534672
VH13	1762511	-0.006272994	0.05001082	0.05776494	0.019185537
VH14	1866059	-0.016573526	0.07228442	0.04341043	0.033402902
VH15	1818037	-0.011796529	0.01975955	0.04419040	0.033402946
VH16	1770446	-0.007062300	0.02905533	0.05930549	0.033402953
VH17	1738813	-0.003915555	0.06854871	0.07382352	0.033402967
VH20	1747853	-0.004814853	0.09784488	0.08929653	0.054801959
VH21	1814917	-0.011486108	0.01229264	0.05423180	0.007550579
VH23	1777067	-0.007720933	0.07421866	0.04149765	0.004909506
VH24	1797434	-0.009747015	0.06935590	0.04788781	0.033402938
VH25	1783366	-0.008347534	0.07336557	0.05225761	0.012452153
VH26	1714132	-0.001460374	0.17711033	0.11783234	0.109450292
VH28	1683177	0.001618957	0.04476280	0.14039756	0.033403045
VH29	1806044	-0.010603486	0.08258133	0.04141093	-0.007356106
Note:
We constructed a linear mixed effects model to study the association between Shannon diversity and douching.
Douching, menses, sex and hormonal contraception were modelled as fixed effects and subject id as random effect.
The model also included by-subject random slopes for douching, menses, sex and hormonal contraception.
P-values (in manuscript) were obtained by likelihood ratio tests of the full model with douching against a null-model without douching.

## Sheet: Table 6_Candida
Candida spp. PCR outcome per participant at four study time points and self-reported vaginal symptoms (itchiness, burning sensation etc.) at any time during the study period
id	Start of study	Start of Cycle 2	End of Cycle 2	End of Study	Self-reported vaginal symtoms
VH01	negative	negative	negative	C. ablicans	yes (end of cycle 3)
VH02	negative	negative	negative	negative	no
VH03	C. ablicans	negative	C. ablicans	C. ablicans	no
VH04	negative	negative	C. glabatra	C. glabatra	no
VH05	C. ablicans	negative	C. ablicans	negative	yes (mid-cycle 1; self-medicated with over-the-counter antifungal mid-cycle 1)
VH06	negative	negative	negative	negative	yes (end of cycle 1)
VH07	negative	C. ablicans	negative	negative	yes (mid-cycle 2)
VH08	negative	C. glabatra	negative	negative	no
VH09	negative	negative	C. ablicans	C. glabatra	no
VH10	negative	negative	negative	negative	no
VH11	negative	C. glabatra	negative	negative	no
VH12	C. ablicans	C. ablicans	C. ablicans	negative	yes (entire cycle 3; self-medicated with over-the-counter antifungal end of cycle 3)
VH13	negative	negative	negative	negative	no
VH14	negative	negative	negative	negative	no
VH15	negative	negative	C. ablicans	negative	no
VH16	negative	negative	C. ablicans	negative	no
VH17	C. ablicans	C. ablicans	C. ablicans	C. ablicans	no
VH20	negative	negative	C. ablicans	negative	no
VH21	C. glabatra	negative	negative	negative	no
VH23	negative	negative	C. ablicans	negative	yes (mid-cycle 3)
VH24	negative	negative	negative	negative	no
VH25	negative	negative	negative	negative	no
VH26	negative	negative	negative	negative	no
VH28	negative	C. ablicans	negative	negative	no
VH29	negative	negative	negative	negative	no
